# Supplementary material for: Thromboelastography-guided blood transfusion during cytoreductive surgery combined with hyperthermic intraperitoneal chemotherapy: study protocol for a prospective randomised controlled trial
Source: PubMed Central journal article supplement — BMJ Open. 2020 Nov 12;10(11):e042741. doi: 10.1136/bmjopen-2020-042741 (PMC7662436; doi:10.1136/bmjopen-2020-042741), 2020-11-12
Supplement: bmjopen-2020-042741.draft_revisions.pdf [file bmjopen-2020-042741.draft_revisions.pdf]

# BMJ Open

BMJ Open is committed to open peer review. As part of this commitment we make the peer review history of every article we publish publicly available.

When an article is published we post the peer reviewers' comments and the authors' responses online. We also post the versions of the paper that were used during peer review. These are the versions that the peer review comments apply to.

The versions of the paper that follow are the versions that were submitted during the peer review process. They are not the versions of record or the final published versions. They should not be cited or distributed as the published version of this manuscript.

BMJ Open is an open access journal and the full, final, typeset and author-corrected version of record of the manuscript is available on our site with no access controls, subscription charges or pay-per-view fees (<http://bmjopen.bmj.com>).

If you have any questions on BMJ Open's open peer review process please email [info.bmjopen@bmj.com](mailto:info.bmjopen@bmj.com)

# BMJ Open

## Thromboelastography-guided blood transfusion during cytoreductive surgery combined with hyperthermic intraperitoneal chemotherapy: study protocol for a prospective randomized controlled trial

|                               |                                                                                                                                                                                                                                                                                                                                                                                                                                                                                                                                                                                       |
|-------------------------------|---------------------------------------------------------------------------------------------------------------------------------------------------------------------------------------------------------------------------------------------------------------------------------------------------------------------------------------------------------------------------------------------------------------------------------------------------------------------------------------------------------------------------------------------------------------------------------------|
| Journal:                      | <i>BMJ Open</i>                                                                                                                                                                                                                                                                                                                                                                                                                                                                                                                                                                       |
| Manuscript ID                 | bmjopen-2020-042741                                                                                                                                                                                                                                                                                                                                                                                                                                                                                                                                                                   |
| Article Type:                 | Protocol                                                                                                                                                                                                                                                                                                                                                                                                                                                                                                                                                                              |
| Date Submitted by the Author: | 13-Jul-2020                                                                                                                                                                                                                                                                                                                                                                                                                                                                                                                                                                           |
| Complete List of Authors:     | Wang, Shaoheng; Capital Medical University Affiliated Beijing Shijitan Hospital, Department of Anesthesiology<br>Zhang, Qing; Capital Medical University Affiliated Beijing Shijitan Hospital, Department of Anesthesiology<br>Chen, Linfeng; Capital Medical University Affiliated Beijing Shijitan Hospital, Department of Blood Transfusion<br>Liu, Gang; Capital Medical University Affiliated Beijing Shijitan Hospital, Department of Peritoneal Cancer Surgery<br>Liu, Peng fei; Capital Medical University Affiliated Beijing Shijitan Hospital, Department of Anesthesiology |
| Keywords:                     | Bleeding disorders & coagulopathies < HAEMATOLOGY, Anaesthesia in oncology < ANAESTHETICS, Gastrointestinal tumours < GASTROENTEROLOGY                                                                                                                                                                                                                                                                                                                                                                                                                                                |
|                               |                                                                                                                                                                                                                                                                                                                                                                                                                                                                                                                                                                                       |

SCHOLARONE™  
Manuscripts

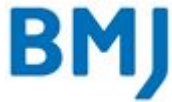

I, the Submitting Author has the right to grant and does grant on behalf of all authors of the Work (as defined in the below author licence), an exclusive licence and/or a non-exclusive licence for contributions from authors who are: i) UK Crown employees; ii) where BMJ has agreed a CC-BY licence shall apply, and/or iii) in accordance with the terms applicable for US Federal Government officers or employees acting as part of their official duties; on a worldwide, perpetual, irrevocable, royalty-free basis to BMJ Publishing Group Ltd ("BMJ") its licensees and where the relevant Journal is co-owned by BMJ to the co-owners of the Journal, to publish the Work in this journal and any other BMJ products and to exploit all rights, as set out in our [licence](#).

The Submitting Author accepts and understands that any supply made under these terms is made by BMJ to the Submitting Author unless you are acting as an employee on behalf of your employer or a postgraduate student of an affiliated institution which is paying any applicable article publishing charge ("APC") for Open Access articles. Where the Submitting Author wishes to make the Work available on an Open Access basis (and intends to pay the relevant APC), the terms of reuse of such Open Access shall be governed by a Creative Commons licence – details of these licences and which [Creative Commons](#) licence will apply to this Work are set out in our licence referred to above.

Other than as permitted in any relevant BMJ Author's Self Archiving Policies, I confirm this Work has not been accepted for publication elsewhere, is not being considered for publication elsewhere and does not duplicate material already published. I confirm all authors consent to publication of this Work and authorise the granting of this licence.

**Title:**

Thromboelastography-guided blood transfusion during cytoreductive surgery combined with hyperthermic intraperitoneal chemotherapy: study protocol for a prospective randomized controlled trial.

**Authors:**

Shaoheng Wang<sup>1</sup>, M.D., Department of Anaesthesiology, Beijing Shijitan Hospital, Capital Medical University, Beijing, China.

Qing Zhang<sup>1</sup>, M.D., Department of Anaesthesiology, Beijing Shijitan Hospital, Capital Medical University, Beijing, China.

Linfeng Chen<sup>2</sup>, M.D., Department of Blood Transfusion, Beijing Shijitan Hospital, Capital Medical University, Beijing, China.

Gang Liu<sup>3</sup>, M.D., Department of Peritoneal Cancer Surgery, Beijing Shijitan Hospital, Capital Medical University, Beijing, China.

Pengfei Liu<sup>1</sup>, M.D., Department of Anaesthesiology, Beijing Shijitan Hospital, Capital Medical University, Beijing, China.

**Corresponding author contact details:**

Pengfei Liu, M.D., Professor,

Department of Anaesthesiology, Beijing Shijitan Hospital, Capital Medical University, Beijing 100038, China.

Phone: (86) 010 63926501.

Fax: (86) 010 63926507.

E-mail: sfflpf@126.com.

**Key words:**

Cytoreductive surgery, Hyperthermic intraperitoneal chemotherapy, Thromboelastography, Blood transfusion

**Word count:** 3977

## Abstract

### Introduction

Cytoreductive surgery combined with hyperthermic intraperitoneal chemotherapy (CRS/HIPEC) is a well-established treatment for peritoneal cancer. However, this kind of combination therapy is connected to a high incidence of complications. Moreover, relative studies have indicated that traditional laboratory testing is insufficient to demonstrate the overall haemostatic physiology of CRS/HIPEC. Thromboelastography (TEG), administered by monitoring dynamic changes in haemostasis, has been shown to contribute to reducing transfusion requirements and improving survival. However, there is no evidence to verify whether TEG can be applied to guide transfusion strategies during CRS/HIPEC. Therefore, we aim to investigate whether TEG-guided blood product transfusion (TEG-BT) therapy is superior to traditional blood product transfusion (T-BT) therapy for guiding perioperative blood transfusion treatment and improving the prognosis of patients undergoing CRS/HIPEC.

### Methods and analysis

The TEG-BT versus T-BT study is a single-centre, randomized, blinded outcome assessment clinical trial of 162 peritoneal cancer patients aged 18-64 years undergoing CRS/HIPEC. Participants will be randomly allocated to receive TEG-BT or T-BT. The primary outcome will be the evaluation of perioperative blood transfusion, which refers to the total amount of blood transfusion given from the time patients enter the operating room up to 72 hours post-operatively. The secondary outcomes will include the transfusion volume during surgery, total amount of intraoperative infusion, amount of blood lost during the operation, total blood transfusion between 0 and 72 hours after surgery, lowest haemoglobin level within 72 hours after surgery, intensive care unit duration, overall length of stay, total cost of hospitalization and adverse events. Data will be analysed according to the intention-to-treat principle.

**Ethical approval and dissemination** The study protocol has been approved by the Scientific Research Ethics Committee of Beijing Shijitan Hospital Affiliated with Capital Medical University (Approval Number: sjtkyll-lx-2020-3). The results will be published in peer-reviewed journals.

1  
2  
3  
4 **Trial registration number** ChiCTR2000028835  
5  
6

7 **Strengths and limitations of this study**  
8

- 9  
10  
11  
12  
13  
14  
15  
16  
17  
18  
19  
20  
21  
22  
23  
24  
25  
26  
27  
28  
29  
30  
31  
32  
33  
34  
35  
36  
37  
38  
39  
40  
41  
42  
43  
44  
45  
46  
47  
48  
49  
50  
51  
52  
53  
54  
55  
56  
57  
58  
59  
60
- This is a randomized, controlled, blinded outcome assessment trial to test the efficacy of thromboelastography (TEG)-guided blood transfusion in cytoreductive surgery combined with hyperthermic intraperitoneal chemotherapy (CRS/HIPEC).
  - The results of this study will improve a more goal-oriented transfusion strategy to reduce intraoperative blood transfusion, stabilize the perioperative coagulation function and lighten the economic burden.
  - Future studies should address the importance of the relationship between transfusion thresholds and TEG parameters for the optimal management of coagulopathy.
  - This is a single-centre trial, which may limit the generalization of conclusions; consequently, multicentre clinical studies with a larger sample size will be required.
  - Although there is no way for anaesthesiologists to be blinded during the trial, the main outcome evaluators will be blinded.

## BACKGROUND

Peritoneal cancer (PC) was previously considered to be a fatal stage of many gastrointestinal malignancies. Patients receiving palliative care had a median survival of 3 to 9 months, depending on the initial stage<sup>1</sup>. Significant progress has been made in the treatment of peritoneal malignancies over the past decade, and increasing evidence supports the use of cytoreductive surgery combined with hyperthermic intraperitoneal chemotherapy (CRS/HIPEC) in an attempt to eradicate the disease macroscopically or microscopically and reduce peritoneal recurrence<sup>2</sup>. Currently, CRS/HIPEC is an established treatment for pseudomyxoma peritonei, colorectal cancer, ovarian cancer, and gastric cancer with intraperitoneal metastasis<sup>3</sup>. The number of patients receiving CRS/HIPEC is expected to rise due to the high mortality of PC and the encouraging long-term benefits of treatment<sup>4</sup>.

Although positive results have been observed in the treatment of tumour disease, CRS/HIPEC is characterized by a high incidence of complications that challenge both intraoperative and postoperative management<sup>5</sup>. Patients undergo CRS/HIPEC with significant fluid and blood loss, as well as chemotherapy and severe fluctuations in the core temperature<sup>6</sup>. Schmidt et al reported that CRS/HIPEC is a long and intricate surgical procedure accompanied by massive blood and fluid loss, with 51% of patients requiring a blood transfusion<sup>7</sup>. Massive intraoperative bleeding and the above factors will certainly lead to severe coagulation disorders. Intraoperative coagulation is a known complication of extensive surgery and HIPEC and may be caused by a combination of the high fluid requirements for resuscitation, direct effects of intraperitoneal chemotherapy, hepatotoxicity due to antitumour drugs, and direct liver injury<sup>8</sup>. Coagulation problems can be part of a series of events that can lead to massive blood loss during surgery, which can compromise the quality of the procedure, increase the need for blood transfusions, and compromise the patient's postoperative process<sup>9</sup>. Therefore, perioperative management of patients undergoing CRS/HIPEC is a challenge for surgeons, anaesthesiologists and critical care physicians<sup>10</sup>.

Regarding the perioperative monitoring of coagulation function, the management of coagulation disorders at 90% of HIPEC centres is guided by standard laboratory tests

1  
2  
3  
4 (SLTs), such as the activated partial thromboplastin time (APTT), prothrombin time  
5 (PT), or international normalized ratio (INR)<sup>11</sup>. Laboratory analysis shows that with an  
6 increase in the INR, coagulation disorders are observed, antithrombin III (AT III) and  
7 fibrinogen values are reduced, APTT is prolonged, and the number of coagulation cells  
8 is reduced<sup>12</sup>. Originally invented by Hartert in 1948, thromboelastography (TEG) is a  
9 viscoelastic, haemostatic assay analyser that imitates sluggish venous flow<sup>13</sup>. It is a  
10 different test from standard coagulation tests in that it measures the viscoelastic  
11 properties of whole blood as it clots, providing comprehensive information about the  
12 dynamics of clot development, stabilization and dissolution and assesses both  
13 thrombosis and fibrinolysis<sup>14 15</sup>. TEG has been used increasingly in intensive care units  
14 (ICUs) and in cases of acute critical surgery to evaluate coagulation disorders and guide  
15 the infusion of blood products for critically ill patients<sup>16</sup>. The technique has been tested  
16 in clinical scenarios such as heart and liver surgery and transplantation to reduce the  
17 number of transfusions and serve as a screening tool for patients managing  
18 hypercoagulant and bleeding disorders<sup>17</sup>. One study has shown that the PT, APTT and  
19 platelet (PLT) count are insufficient to demonstrate the effect of surgical stress,  
20 hyperthermia, chemotherapy and mass fluid transfer on the overall haemostatic  
21 physiology of CRS/HIPEC, while more sophisticated TEG monitoring is more accurate  
22 for perioperative coagulation function monitoring<sup>18</sup>. Another study reported that  
23 although traditional clinical monitoring of coagulation disorders was not meaningful in  
24 CRS/HIPEC, TEG monitoring confirmed that epidural analgesia after CRS/HIPEC was  
25 safe<sup>19</sup>. However, whether the effect of CRS/HIPEC on coagulation function can be  
26 treated according to TEG guidance and the infusion of various blood products can be  
27 guided according to changes in TEG and thereby achieve better outcomes for patients  
28 has not been fully verified.

29  
30  
31  
32  
33  
34  
35  
36  
37  
38  
39  
40  
41  
42  
43  
44  
45  
46  
47  
48  
49  
50  
51  
52 Based on the existing literature, we aim to investigate the advantages of TEG-  
53 guided blood product transfusion (TEG-BT) in perioperative blood protection during  
54 CRS/HIPEC. Our working hypothesis is that compared with traditional blood product  
55 transfusion (T-BT) patients, TEG-BT patients receive fewer transfusions of  
56 intraoperative blood products and exhibit a more stable perioperative coagulation  
57  
58  
59  
60



1  
2  
3  
4 function, no reduction in postoperative haemoglobin (HGB) levels and coagulation  
5 function, shorter hospital stays, and no increase in the incidence of adverse reactions.  
6

## 7 **METHODS AND ANALYSIS**

### 8 **Trial design**

9  
10 The trial will be conducted at Beijing Shijitan Hospital, Capital Medical University in  
11 Beijing, China. The study started recruiting patients in May 2020 and will continue  
12 for one year. The TEG-BT versus T-BT study is a single-centre, randomized, blinded  
13 outcome assessment clinical trial that conforms to the Consolidated Standards of  
14 Reporting Trials<sup>20</sup>. CRS/HIPEC is planned for two groups of patients, and TEG-BT or  
15 T-BT is adopted for perioperative blood transfusion management. The ratio of the two  
16 groups is 1:1 (Figure 1).  
17  
18  
19  
20  
21  
22  
23  
24

### 25 **Objectives**

26 The purpose of this study is to verify whether TEG-BT is better than T-BT for  
27 perioperative blood transfusion treatment and the prognosis of patients undergoing  
28 CRS/HIPEC.  
29  
30  
31  
32

### 33 **Participants**

#### 34 **Inclusion criteria**

35 Patients who meet all of the following criteria are eligible for inclusion:  
36

- 37 1. Age of 18-64 years
- 38 2. American Society of Anaesthesiologists (ASA) grade I or II
- 39 3. Well-established histologic diagnosis of peritoneal disease
- 40 4. Performance of CRS/HIPEC under general anaesthesia
- 41 5. Written consent to participate in the study

#### 42 **Exclusion criteria**

- 43 1. Anaemia
  - 44 2. Abnormal coagulation function before surgery
  - 45 3. Uncontrolled systemic infections
  - 46 4. Long-term anticoagulant or anti-PLT therapy
  - 47 5. Thrombotic events
  - 48 6. Severe cardiopulmonary disease
- 49  
50  
51  
52  
53  
54  
55  
56  
57  
58  
59  
60

- 1
- 2
- 3
- 4 7. Hepatic or renal failure
- 5
- 6 8. Pregnancy or lactation
- 7
- 8 9. Patient refusal to sign the informed consent form
- 9
- 10 10. Patient participation in another clinical-treatment study

### 11 **Randomization and blinding**

12 All participants will be randomly divided into two groups: TEG-BT for the  
13 experimental group and T-BT for the control group. Before the study begins, an  
14 independent investigator who is not exposed to any of the participants will use a simple  
15 randomized method to divide the two groups in a 1:1 ratio. The random numbers will  
16 be saved in sealed opaque envelopes. Before surgery, the anaesthesiologist will evaluate  
17 the patient, and after the informed consent form is signed, the envelope will be opened  
18 to obtain the grouping information of the patient. Blood transfusion will be performed  
19 intraoperatively according to the grouping of the patients. After the operation,  
20 independent follow-up staff will collect the data of the patients during and after the  
21 operation according to the electronic medical record system. During the whole  
22 experiment, the anaesthesiologists will be aware of the patient grouping information,  
23 but they will not participate in the postoperative follow-up and data collection. Other  
24 individuals and personnel involved, including patients, surgeons, data collectors, etc.,  
25 will not know the grouping information.

### 26 **Anaesthesia management**

27 The anaesthesia regimen will be consistent between the two groups. Venous access will  
28 be open in all patients in the preparation room, and midazolam will be administered  
29 (0.05 mg/kg intravenously) to the patients before they enter the operating room. Upon  
30 arrival in the operating room, standard monitoring (pulse oximetry, electrocardiogram,  
31 and noninvasive arterial blood pressure monitoring) will be established. Sufentanil 0.5  
32 µg/kg, propofol 2.5 mg/kg and rocuronium 0.6 mg/kg will be adopted for general  
33 anaesthesia induction. After endotracheal intubation, the lungs will be aerated with 50%  
34 oxygen and 50% air mixture, and the ventilation level will be adjusted to maintain  
35 normocapnia. Radial artery and internal jugular vein puncture will be performed to  
36 monitor the invasive arterial pressure and central venous pressure. We will perform an  
37  
38  
39  
40  
41  
42  
43  
44  
45  
46  
47  
48  
49  
50  
51  
52  
53  
54  
55  
56  
57  
58  
59  
60

1  
2  
3  
4 ultrasound-guided bilateral rectus sheath blockade, and 0.375% ropivacaine will be  
5 given for analgesia on both sides. Anaesthesia will be maintained with inhalation of  
6 sevoflurane and IV remifentanyl, and muscle relaxation will be maintained with IV  
7 rocuronium. Postoperative intravenous injection of atropine 0.01 mg/kg and  
8 neostigmine 0.05 mg/kg will be used to antagonize residual neuromuscular block.  
9 Extubation will be performed after confirming that the patient's eyes are open and that  
10 he or she exhibits adequate spontaneous breathing and purposeful movement.  
11  
12  
13  
14  
15  
16

### 17 **Intraoperative intervention**

18 All enrolled patients will be assigned to one of the following two study groups. For  
19 patients in the T-BT group, the anaesthesiologist will inject blood products according  
20 to his or her clinical judgement. Patients entering the TEG-BT group will undergo TEG  
21 monitoring 4 times before surgery, during CRS, before HIPEC and after HIPEC, and  
22 blood products such as erythrocytes, plasma, PLTs, prothrombin complex and  
23 fibrinogen will be administered according to the monitoring results. The two groups of  
24 patients will be given red blood cells (RBCs) to maintain HGB levels of at least 10 g/dl.  
25 Blood will be collected from the central vein through a three-way catheter. The first 10  
26 ml of venous blood will be administered to the patient through the peripheral venous  
27 pathway, and then 3.5 ml of venous blood will be collected after syringe replacement.  
28 According to relevant guidelines, the samples of whole blood should be tested within 5  
29 minutes after collection.  
30  
31  
32  
33  
34  
35  
36  
37  
38  
39  
40  
41

42 All blood samples will be tested by the same professional TEG operator. The operator  
43 of the TEG machine model [TEG 5000 (Haemoscope)] will not know the patient  
44 grouping information.  
45  
46  
47

48 R time is the incubation period from blood entry into the reactive vessels to initial clot  
49 formation. The lack of the R time extension prompt factor can be corrected by fresh  
50 frozen plasma (FFP)<sup>21</sup>. When the R time value is greater than 10 minutes, the patient  
51 will be infused with 2 U of FFP; when the R time value is greater than 15 minutes, the  
52 patient will be infused with 4 U of plasma; when the R time value is greater than 20  
53 minutes, the patient will be infused with 6 U<sup>22</sup>.  
54  
55  
56  
57  
58  
59  
60

Angle  $\alpha$  is the measurement of fibrin cross linkage mechanics or clot strengthening

speed. A low angle may indicate a lack of fibrinogen, which is less affected by the PLT count, and this loss of function may be corrected by the use of FFP or fibrinogen.

MA is a direct effect of fibrin and PLT binding properties of glycoprotein IIb/IIIa (GPIIb/IIIa), representing the strength of fibrin clots. Low MA may be corrected by the administration of PLTs<sup>21</sup>. At  $Ma < 45$ , PLT transfusion will begin. LY30 values show the rate of thrombus rupture at 30 minutes after MA. When  $LY30 > 8\%$ , this indicates hyperfibrinolysis, which can be corrected by tranexamic acid.

### Outcomes

Table 1 provides an overview of the outcomes and intervention or assessment time points.

Table 1. Study visits of the TEG-BT vs T-BT trial

| Time point               | Enrolment    | Allocation | Post-allocation |     |     |     |     |     |     |     |     |     | Discharged |
|--------------------------|--------------|------------|-----------------|-----|-----|-----|-----|-----|-----|-----|-----|-----|------------|
|                          | Preoperative | 0 d        | T 0             | T 1 | T 2 | T 3 | T 4 | T 5 | T 6 | T 7 | T 8 | T 9 |            |
| Enrolment                |              |            |                 |     |     |     |     |     |     |     |     |     |            |
| Eligibility screen       | X            |            |                 |     |     |     |     |     |     |     |     |     |            |
| Informed consent         | X            |            |                 |     |     |     |     |     |     |     |     |     |            |
| Allocation               |              | X          |                 |     |     |     |     |     |     |     |     |     |            |
| Interventions            |              |            |                 |     |     |     |     |     |     |     |     |     |            |
| TEG-BT                   |              |            | X               | X   | X   | X   |     |     |     |     |     |     |            |
| T-BT                     |              |            |                 |     |     |     |     |     |     |     |     |     |            |
| Assessments              |              |            |                 |     |     |     |     |     |     |     |     |     |            |
| Demographic data         | X            | X          |                 |     |     |     |     |     |     |     |     |     |            |
| Baseline variables       |              | X          |                 |     |     |     |     |     |     |     |     |     |            |
| HGB                      |              | X          |                 |     |     |     | X   | X   | X   | X   | X   |     |            |
| Hct                      |              | X          |                 |     |     |     | X   | X   | X   | X   | X   |     |            |
| PLTs                     |              | X          |                 |     |     |     | X   | X   | X   | X   | X   |     |            |
| PT                       |              | X          |                 |     |     |     | X   | X   | X   | X   | X   |     |            |
| APTT                     |              | X          |                 |     |     |     | X   | X   | X   | X   | X   |     |            |
| INR                      |              | X          |                 |     |     |     | X   | X   | X   | X   | X   |     |            |
| Fibrinogen               |              | X          |                 |     |     |     | X   | X   | X   | X   | X   |     |            |
| Crystalloid fluid        |              |            |                 |     |     |     | X   |     |     |     |     |     |            |
| Artificial colloid fluid |              |            |                 |     |     |     | X   |     |     |     |     |     |            |
| RBCs                     |              |            |                 |     |     |     | X   |     |     |     |     |     |            |
| FFP                      |              |            |                 |     |     |     | X   |     |     |     |     |     |            |
| PLTs                     |              |            |                 |     |     |     | X   |     |     |     |     |     |            |
| Fibrinogen               |              |            |                 |     |     |     | X   |     |     |     |     |     |            |
| Prothrombin complex      |              |            |                 |     |     |     | X   |     |     |     |     |     |            |

1  
2  
3  
4  
5  
6  
7  
8  
9  
10  
11  
12  
13  
14  
15  
16  
17  
18  
19  
20  
21  
22  
23  
24  
25  
26  
27  
28  
29  
30  
31  
32  
33  
34  
35  
36  
37  
38  
39  
40  
41  
42  
43  
44  
45  
46  
47  
48  
49  
50  
51  
52  
53  
54  
55  
56  
57  
58  
59  
60

|                                                               |   |   |
|---------------------------------------------------------------|---|---|
| Albumin                                                       | X |   |
| Blood loss                                                    | X |   |
| Urine output                                                  | X |   |
| The amount of blood lost between 0 and 72 hours after surgery |   | X |
| Total blood transfusion between 0 and 72 hours after surgery  |   | X |
| The lowest HGB level                                          |   | X |
| ICU duration                                                  |   | X |
| Overall length of stay                                        |   | X |
| Total cost of the hospitalization                             |   | X |

T0, entering the operating room; T1, the performance of CRS; T2, before HIPEC; T3, after HIPEC; T4, at the end of surgery; T5, 2 hours after surgery; T6, postoperative day 1; T7, postoperative day 2; T8, postoperative day 3; T9, postoperative day 5.

TEG-BT, thromboelastography-guided blood product transfusion therapy; T-BT, traditional blood product transfusion therapy; HGB, haemoglobin; Hct, haematocrit; PLTs, platelets; PT, prothrombin time; APTT, activated partial thromboplastin time; INR, the international ratio; RBCs, red blood cells; FFP, fresh frozen plasma; ICU, intensive care unit.

### Primary outcome

The primary outcome will be the evaluation of perioperative blood transfusion. The amount of blood transfusion during the perioperative period refers to the total amount of blood transfusion given from the time patients enter the operating room (intra-operative) to 72 hours post-operatively (post-operative), including RBCs, FFP and PLTs.

### Secondary outcomes

The secondary results mainly include the following aspects:

- Transfusion volume during the operation: The total amount of RBCs, FFP and PLTs in the two groups.
- The total amount of intraoperative infusion: During the operation, the amount of fluid input from the two groups will include the total amount of crystalloid fluid, artificial colloid fluid, albumin, fibrinogen and prothrombin complex.

- The amount of blood lost during the operation: During the operation, the total output of the two groups will include blood loss and urine output.
- Effects of CRS/HIPEC on TEG: Before and after CRS/HIPEC, TEG monitoring will assess changes in blood coagulation function: including reaction time (R time), thrombosis time (K time), fibrinogen function ( $\alpha$  angle), thrombus strength (MA), and fibrinolysis (LY30).
- Effects of surgery on indicators of coagulation function: The influence of surgery on coagulation function. Based on the routine blood cell count and coagulation test, the values of HGB, PLT count, PT, APTT and INR will be recorded 1, 2, 3 and 5 days after the operation.
- The amount of total blood lost between 0 and 72 hours after surgery: total blood lost is calculated using the formula provided by Gross<sup>23</sup>, total blood loss = PBV  $\times$  (Hct<sub>pre</sub> - Hct<sub>post</sub>) / Hct<sub>ave</sub>. The peripheral blood volume (PBV) is then calculated using the formula proposed by Nadler et al.<sup>24</sup>:  $PBV = k_1 \times \text{height(m)}^3 + k_2 \times \text{weight(kg)} + k_3$ , where  $k_1 = 0.3669$ ,  $k_2 = 0.03219$ , and  $k_3 = 0.6041$  for men, and  $k_1 = 0.3561$ ,  $k_2 = 0.03308$ , and  $k_3 = 0.1833$  for women.
- Total blood transfusion between 0 and 72 hours after surgery: Within 0-72 hours after the operation, patients will again receive a blood transfusion, including the total amount of RBCs, FFP and PLTs.
- The lowest HGB within 72 hours after surgery: Within three days after the operation, blood samples will be collected every morning to measure the HGB level. Patients who need a second operation due to postoperative bleeding within 72 hours will be excluded from this study.
- ICU duration.
- Overall length of stay.
- Total cost of the hospitalization.

### **Adverse events**

Adverse events in this study will mainly include intraoperative blood transfusion-related adverse reactions: nonhemolytic febrile reactions, allergic reactions, haemolytic reactions, circulatory overload and acid-base imbalance; etc. Once the anaesthesiologist

1  
2  
3  
4 identifies an adverse event, all patients should be accurately documented and  
5 immediately treated. If the condition progresses to severe intraoperative adverse events,  
6 such as shock, heart failure and massive blood loss, the patient will be excluded from  
7 the study.  
8  
9  
10

### 11 **Data collection**

12  
13 Throughout the trial, the investigator – the anaesthesiologist involved in the operation  
14 – will be completely independent of the data collection staff. Data collection personnel  
15 are responsible for collecting preoperative and postoperative patient information and  
16 all data required in the trial protocol. Anonymous data will be collected in the case  
17 report form (CRF), either numerically or alphabetically. After the completion of the  
18 anonymous CRF table, the researcher shall confirm the authenticity and validity of all  
19 data, give a reasonable explanation for any missing data, or choose to exclude the test  
20 scheme.  
21  
22  
23  
24  
25  
26  
27  
28

### 29 **Sample size calculation**

30  
31 The Pass 11.0 software package was used for sample size evaluation. According to a  
32 small sample (86 cases) observation study in the early stage of the research group, it  
33 was found that the allogeneic blood volume used in the operation of PC patients  
34 undergoing thermal perfusion chemotherapy was  $1664.7 \pm 789.3$  ml [median: 1600  
35 (1200, 2000)]. It is estimated that the blood volume of allogeneic patients used in  
36 thromboelastogram monitoring after intervention could be reduced by 20%, i.e.,  $1331.8$   
37  $\pm 631.4$  ml, with a set  $\alpha$  value of 0.05 and a  $\beta$  value of 0.2, and the sample volume of  
38 the two groups was 73 cases. However, the index of allogeneic blood volume is non-  
39 normally distributed data, and a nonparametric test is planned to be used for analysis.  
40 Compared with the t-test, the efficiency of the Wilcoxon rank sum test is estimated to  
41 be approximately 95%, which means that the sample size required for the Wilcoxon  
42 test is 1.053 times the sample size required for the t-test<sup>25</sup>. Therefore, the number of  
43 subjects to be included in the study was increased by 1.053 times, and the drop-out rate  
44 was maintained to within 5%. The final target sample size was 81 people in each group  
45 (162 people in total).  
46  
47  
48  
49  
50  
51  
52  
53  
54  
55  
56  
57  
58  
59  
60

### **Statistical analysis**

### Baseline characteristics

Data analyses will be performed by the statistical software SPSS version 25.0. During the trial, the statistical analyst will be unaware of the participants' personal information and their group assignment. The Kolmogorov-Smirnov test will be used to test the normal distribution of continuous variables. If data values are normally distributed, they will be presented as the mean  $\pm$  standard deviation (SD) and will be compared using the independent t-test. If data values are not normally distributed, they will be presented as median and interquartile range (IQR) and compared using the nonparametric test. Categorical data will be shown as frequency and percentage and compared using the  $\chi^2$  test or Fisher's exact test.

### Primary outcome and secondary outcomes

The primary outcome, the total amount of blood transfusion, will be presented as the mean  $\pm$  SD or median and IQR and compared using the independent t-test or Wilcoxon's rank sum test. For the secondary outcomes (i.e., transfusion volume during the operation, total amount of intraoperative infusion, amount of blood lost during the operation, total blood transfusion between 0 and 72 hours after surgery, and lowest HGB within 72 hours after surgery), the t-test will be used to compare the measurement data, and the rank sum test will be used for ranked data. The  $\chi^2$  test or Fisher's exact test will be used to analyse categorical data (adverse events). The effect size, mean differences, and their confidence intervals will be reported to make the results comparable. For repeated variables, a repeated-measures analysis of covariance will be performed with visit time as the repeated factor and group as the non-repeated factor. All analyses will be performed on the intention-to-treat population of participants who are given the randomized treatment. Missing data will be handled using the multiple imputation method. A complete-case analysis without imputation of missing data will also be performed to determine whether the results are consistent. The significance level that will be used for statistical analysis with two-tailed testing will be 5%. No interim analyses will be performed.

## DISCUSSION

The TEG-BT versus T-BT study is a single-centre and randomized clinical trial with



1  
2  
3  
4 a blinded outcome assessment that aims to verify whether TEG-BT is superior to T-BT  
5 in the perioperative blood transfusion treatment and prognosis of patients in  
6 CRS/HIPEC. If it can be proven that compared with T-BT, TEG-BT can lead to less  
7 intraoperative blood transfusion, more stable perioperative coagulation function, no  
8 reduction in postoperative HGB levels and coagulation function, and no increase in the  
9 incidence of adverse events, then the treatment and transfusion of various blood  
10 products can be guided according to changes in the TEG index to achieve a better  
11 prognosis.  
12  
13  
14  
15  
16  
17  
18

19 CRS/HIPEC is a therapeutic method for patients with colorectal, appendiceal,  
20 ovarian, and gastric cancer with peritoneal metastasis and peritoneal mesothelioma<sup>26-</sup>  
21 <sup>28</sup>. A relevant study demonstrated that intraoperative transfusion of RBCs and a possibly  
22 increased peritoneal carcinomatosis index (PCI) are associated with abnormal  
23 postoperative coagulation, including changes in the PLT count, INR, and partial  
24 thromboplastin time (PTT)<sup>4</sup>. Based on the above points, optimal blood product  
25 transfusion is of great importance for patients receiving CRS/HIPEC.  
26  
27  
28  
29  
30  
31  
32

33 SLTs, including the fibrinogen concentration, INR, PT and APTT, were initially used  
34 to diagnose intraoperatively acquired coagulopathy and guide the administration of  
35 treatment for massive haemorrhage<sup>29 30</sup>. However, relevant data suggest that the PT,  
36 APTT and PLT count insufficiently demonstrate the impact of surgical stress,  
37 hyperthermia, chemotherapy and considerable fluid shifts on the overall haemostatic  
38 physiology of CRS/HIPEC<sup>18</sup>. Routine laboratory testing is performed in PLT-deficient  
39 plasma whose results are not available to the clinician for 45–60 minutes<sup>30-32</sup>; in contrast,  
40 TEG can make up for the above deficiencies as a bedside analysis tool, estimating the  
41 clotting process in whole blood and providing real-time data<sup>33</sup>. Increasing evidence has  
42 demonstrated that the application of a TEG-guided transfusion strategy can reduce the  
43 demand for blood products and improve the morbidity of bleeding patients, mainly  
44 according to trials involving heart surgery with cardiopulmonary bypass and liver  
45 transplantation surgery<sup>34 35</sup>. After many clinical experiences and the application of TEG,  
46 targeted coagulation therapy has become feasible<sup>36</sup>. A previous prospective study  
47 indicated that conventional coagulation measures had no significance for CRS/HIPEC,  
48  
49  
50  
51  
52  
53  
54  
55  
56  
57  
58  
59  
60

1  
2  
3  
4 but TEG monitoring confirmed the suitability of epidural analgesia after CRS/HIPEC  
5 by evaluating perioperative clot kinetics<sup>37</sup>. However, there is no relevant study to verify  
6 whether TEG can be applied to guide transfusion strategies for treating coagulation  
7 disorders due to CRS/HIPEC. Therefore, it is believed that the use of TEG in guiding  
8 perioperative blood transfusion treatment and improving prognosis of patients  
9 undergoing CRS/HIPEC is definitely worth exploring.

10  
11  
12  
13  
14  
15 The current study still has several limitations. First, for various reasons, we did not  
16 observe certain long-term outcomes, such as overall mortality, the incidence of  
17 reoperation, transfusion-related complications and thrombotic/thromboembolic events.  
18 Nevertheless, the influence of TEG-BT on these outcomes is worthy of further  
19 exploration. Moreover, due to the design of this trial, it is not available to determine the  
20 impact of pathophysiological changes in patients with potential diseases; therefore, we  
21 will remove severely ill patients from this study for safety reasons. Additionally, further  
22 studies may be required to determine whether TEG-BT combined with T-BT is superior  
23 to either alone for guiding the perioperative blood transfusion treatment of patients  
24 receiving CRS/HIPEC. Last but not least, this study is a single-centre trial, which may  
25 limit its generalisability; consequently, it is of great importance to perform multicentre  
26 clinical studies with a larger sample size to provide higher levels of evidence.

27  
28  
29  
30  
31  
32  
33  
34  
35  
36  
37  
38  
39  
40  
41  
42  
43  
44  
45  
46  
47  
48  
49  
50  
51  
52  
53  
54  
55  
56  
57  
58  
59  
60  
The primary outcome of our study is perioperative blood transfusion. As mentioned  
earlier, patients treated with CRS/HIPEC undergo an extensive abdominal incision,  
large fluid shifts, hyperthermic insults, and exposure to chemotherapeutic agents, which  
increases the likelihood of altered coagulation and excessive bleeding<sup>4 38 39</sup>. Therefore,  
rational transfusion strategies are warranted. Extensive literature notes that allogeneic  
blood transfusion itself is an independent risk factor for increased morbidity  
(thrombotic/thromboembolic events, anaemia, nosocomial infections, multiorgan  
dysfunction syndrome), mortality, hospital stay, hospital costs, etc., in trauma,  
cardiovascular surgery, and ICU patients<sup>40-43</sup>. Nevertheless, TEG can be performed to  
monitor dynamic changes in haemostasis, which is thought to enable clinicians to  
distinguish between a surgical cause of bleeding or coagulopathy, to guide and evaluate  
the choice of haemostatic treatment, and to reduce transfusion requirements and

1  
2  
3  
4 improve survival<sup>34</sup>. In contrast, postoperative bleeding and coagulation disorders also  
5 increase the transfusion of allogeneic blood products, thereby affecting morbidity and  
6 mortality<sup>36</sup>. Hence, to further explore their interaction in patients undergoing  
7 CRS/HIPEC, the indicators of coagulation function, lowest value of HGB within 72  
8 hours after surgery, ICU duration, overall length of stay, and costs incurred during the  
9 hospital stay will be the secondary outcomes of this study.  
10  
11  
12  
13  
14

15 To conclude, the TEG-BT versus T-BT trial will be the first single-centre,  
16 randomized clinical trial with a blinded outcome assessment undertaken to substantiate  
17 the hypothesis that TEG-BT is superior to T-BT for administering perioperative blood  
18 transfusion treatment and improving the prognosis of patients undergoing CRS/HIPEC.  
19 If the benefits mentioned in the hypothesis are confirmed, our study will improve a  
20 more goal-oriented transfusion strategy to reduce intraoperative blood transfusion,  
21 stabilize perioperative coagulation function and lighten the economic burden.  
22 Combined with our research results, the potential significance of this trial is that it may  
23 influence future guidelines on anaesthesia management of CRS/HIPEC and bring wider  
24 application for TEG.  
25  
26  
27  
28  
29  
30  
31  
32  
33

## 34 **ETHICS AND DISSEMINATION**

### 35 **Ethical and legislative approvals**

36  
37 The TEG-BT vs T-BT study is registered at the Chinese Clinical Trial Registry with the  
38 trial identification number ChiCTR2000028835. The research plan was approved by  
39 the scientific research ethics committee of Beijing Shijitan Hospital Affiliated with  
40 Capital Medical University (Approval Number: sjtkyll-lx-2020-3). We will inform  
41 investigators, all participants and the trial registry when there are significant changes to  
42 the study protocol. Before each participant enters the study, he/she and the researchers  
43 will sign an informed consent form. Patients have the right to refuse or withdraw from  
44 the study at any time, which will not affect any of their medical or other interests. The  
45 personal information of the participants will be kept confidential, and anonymous  
46 personal patient data will be shared according to requirements.  
47  
48  
49  
50  
51  
52  
53  
54  
55  
56

### 57 **Publication plan**

58 With the consent of the main researchers and methodologists, the research coordinator  
59  
60

1  
2  
3  
4 will be responsible for preparing scientific statements and reports corresponding to the  
5 study. Based on the proportion of contribution to the study, the participating researchers  
6 and clinicians as well as biostatisticians and related researchers will be the co-authors  
7 of the ensuring report and publication. The rules of publication will be in accordance  
8 with international recommendations, and the publications will be submitted to peer-  
9 reviewed journals<sup>44</sup>.  
10  
11  
12  
13  
14

### 15 16 17 **Author affiliations**

18  
19 <sup>1</sup>Department of Anaesthesiology, Beijing Shijitan Hospital, Capital Medical University,  
20 Beijing, China.  
21

22  
23 <sup>2</sup>Department of Blood Transfusion, Beijing Shijitan Hospital, Capital Medical  
24 University, Beijing, China.  
25

26  
27 <sup>3</sup>Department of Peritoneal Cancer Surgery, Beijing Shijitan Hospital, Capital Medical  
28 University, Beijing, China.  
29

### 30 31 **Contributors**

32  
33 WS and ZQ contributed equally to this work and should be considered co-first authors.  
34  
35 WS and ZQ contributed to the conception and drafting of the first manuscript for this  
36 trial. LP is the principal investigator of the entire study and edited the final manuscript.  
37  
38 CL and LG contributed to the conception of the research protocol and will participate  
39 in the follow-up for this trial. All authors critically revised and modified the protocol  
40 and the article. They all approved the final version to be published.  
41  
42  
43

### 44 45 **Funding**

46  
47 This research was supported by The Youth Science Foundation of Beijing Shijitan  
48 Hospital Affiliated with Capital Medical University (No. 2019-q19).  
49

### 50 51 **Competing interests**

52  
53 None declared.

### 54 55 **Patient consent for publication**

56  
57 Obtained.

### 58 59 **Provenance and peer review**

60  
Not commissioned; externally peer reviewed.

## Data sharing statement

No additional unpublished data are available.

## REFERENCES

1. Glehen O, Osinsky D, Beaujard AC, et al. Natural history of peritoneal carcinomatosis from nongynecologic malignancies. *Surgical Oncology Clinics of North America* 2003;12(3):729-39. doi: 10.1016/s1055-3207(03)00044-9
2. Sargant N, Roy A, Simpson S, et al. A protocol for management of blood loss in surgical treatment of peritoneal malignancy by cytoreductive surgery and hyperthermic intraperitoneal chemotherapy. *Transfus Med* 2016;26(2):118-22. doi: 10.1111/tme.12301 [published Online First: 2016/04/01]
3. Gupta N, Kumar V, Garg R, et al. Anesthetic implications in hyperthermic intraperitoneal chemotherapy. *J Anaesthesiol Clin Pharmacol* 2019;35(1):3-11. doi: 10.4103/joacp.JOACP\_93\_18 [published Online First: 2019/05/07]
4. Hurdle H, Bishop G, Walker A, et al. Coagulation after cytoreductive surgery and hyperthermic intraperitoneal chemotherapy: a retrospective cohort analysis. *Canadian Journal of Anesthesia/Journal canadien d'anesthésie* 2017;64(11):1144-52. doi: 10.1007/s12630-017-0952-7
5. Chua TC, Robertson G, Liauw W, et al. Intraoperative hyperthermic intraperitoneal chemotherapy after cytoreductive surgery in ovarian cancer peritoneal carcinomatosis: systematic review of current results. *J Cancer Res Clin Oncol* 2009;135(12):1637-45. doi: 10.1007/s00432-009-0667-4 [published Online First: 2009/08/25]
6. Korakianitis O, Daskalou T, Alevizos L, et al. Lack of significant intraoperative coagulopathy

- 1  
2  
3  
4 in patients undergoing cytoreductive surgery and hyperthermic intraperitoneal  
5  
6 chemotherapy (HIPEC) indicates that epidural anaesthesia is a safe option. *Int J*  
7  
8 *Hyperthermia* 2015;31(8):857-62. doi: 10.3109/02656736.2015.1075606 [published  
9  
10 Online First: 2015/10/09]  
11  
12  
13  
14 7. Schmidt C, Creutzenberg M, Piso P, et al. Peri-operative anaesthetic management of  
15  
16 cytoreductive surgery with hyperthermic intraperitoneal chemotherapy. *Anaesthesia*  
17  
18 2008;63(4):389-95. doi: 10.1111/j.1365-2044.2007.05380.x  
19  
20  
21  
22 8. Desgranges FP, Steghens A, Mithieux F, et al. Potential risks of thoracic epidural analgesia  
23  
24 in hyperthermic intraperitoneal chemotherapy. *J Surg Oncol* 2010;101(5):442. doi:  
25  
26 10.1002/jso.21485 [published Online First: 2010/03/10]  
27  
28  
29  
30 9. Wijeyesundera DN, Beattie WS, Austin PC, et al. Epidural anaesthesia and survival after  
31  
32 intermediate-to-high risk non-cardiac surgery: a population-based cohort study. *The*  
33  
34 *Lancet* 2008;372(9638):562-69. doi: 10.1016/s0140-6736(08)61121-6  
35  
36  
37  
38 10. Webb CA, Weyker PD, Moitra VK, et al. An overview of cytoreductive surgery and  
39  
40 hyperthermic intraperitoneal chemoperfusion for the anesthesiologist. *Anesth Analg*  
41  
42 2013;116(4):924-31. doi: 10.1213/ANE.0b013e3182860fff [published Online First:  
43  
44 2013/03/06]  
45  
46  
47  
48 11. Bell JC, Rylah BG, Chambers RW, et al. Perioperative management of patients undergoing  
49  
50 cytoreductive surgery combined with heated intraperitoneal chemotherapy for  
51  
52 peritoneal surface malignancy: a multi-institutional experience. *Ann Surg Oncol*  
53  
54 2012;19(13):4244-51. doi: 10.1245/s10434-012-2496-y [published Online First:  
55  
56 2012/07/19]  
57  
58  
59  
60

- 1  
2  
3  
4 12. Schmidt C, Creutzenberg M, Piso P, et al. Peri-operative anaesthetic management of  
5  
6 cytoreductive surgery with hyperthermic intraperitoneal chemotherapy. *Anaesthesia*  
7  
8 2008;63(4):389-95. doi: 10.1111/j.1365-2044.2007.05380.x [published Online First:  
9  
10 2008/03/14]  
11  
12  
13  
14 13. Hartert H. Blood coagulation studies using thromboelastography, a new evaluation  
15  
16 technique (in German). *Klin Wochenschr* 1948;26(37-38):577-83. doi:  
17  
18 10.1007/bf01697545 [published Online First: 1948/10/01]  
19  
20  
21  
22 14. da Luz LT, Nascimento B, Rizoli S. Thrombelastography (TEG(R)): practical considerations  
23  
24 on its clinical use in trauma resuscitation. *Scand J Trauma Resusc Emerg Med*  
25  
26 2013;21:29. doi: 10.1186/1757-7241-21-29 [published Online First: 2013/04/17]  
27  
28  
29  
30 15. Whiting D, DiNardo JA. TEG and ROTEM: technology and clinical applications. *Am J*  
31  
32 *Hematol* 2014;89(2):228-32. doi: 10.1002/ajh.23599 [published Online First:  
33  
34 2013/10/15]  
35  
36  
37  
38 16. Meybohm P, Zacharowski K, Weber CF. Point-of-care coagulation management in  
39  
40 intensive care medicine. *Crit Care* 2013;17(2):218. doi: 10.1186/cc12527 [published  
41  
42 Online First: 2013/03/21]  
43  
44  
45  
46 17. Chitlur M, Sorensen B, Rivard GE, et al. Standardization of thromboelastography: a report  
47  
48 from the TEG-ROTEM working group. *Haemophilia* 2011;17(3):532-7. doi:  
49  
50 10.1111/j.1365-2516.2010.02451.x [published Online First: 2011/02/18]  
51  
52  
53  
54 18. Van Poucke S, Huskens D, Van der Speeten K, et al. Thrombin generation and platelet  
55  
56 activation in cytoreductive surgery combined with hyperthermic intraperitoneal  
57  
58 chemotherapy - A prospective cohort study. *PLoS One* 2018;13(6):e0193657. doi:  
59  
60

- 1  
2  
3  
4 10.1371/journal.pone.0193657 [published Online First: 2018/06/22]  
5  
6  
7 19. Teoh DA, Hutton MJH, Else S, et al. Epidural analgesia? A prospective analysis of  
8  
9 perioperative coagulation in cytoreductive surgery and hyperthermic intraperitoneal  
10  
11 chemotherapy. *Am J Surg* 2019;217(5):887-92. doi: 10.1016/j.amjsurg.2019.01.034  
12  
13 [published Online First: 2019/02/28]  
14  
15  
16  
17 20. Moher D, Hopewell S, Schulz KF, et al. CONSORT 2010 Explanation and Elaboration:  
18  
19 updated guidelines for reporting parallel group randomised trials. *Bmj* 2010;340(mar23  
20  
21 1):c869-c69. doi: 10.1136/bmj.c869  
22  
23  
24  
25 21. Olson JC. Thromboelastography-Guided Blood Product Use Before Invasive Procedures in  
26  
27 Cirrhosis With Severe Coagulopathy: A Randomized Controlled Trial. *Clin Liver Dis*  
28  
29 (*Hoboken*) 2019;13(4):102-05. doi: 10.1002/cld.749 [published Online First:  
30  
31 2019/05/08]  
32  
33  
34  
35 22. Welsh KJ, Nedelcu E, Bai Y, et al. How do we manage cardiopulmonary bypass  
36  
37 coagulopathy? *Transfusion* 2014;54(9):2158-66. doi: 10.1111/trf.12751  
38  
39  
40  
41 23. Gross JB. Estimating allowable blood loss: corrected for dilution. *Anesthesiology*  
42  
43 1983;58(3):277-80. doi: 10.1097/00000542-198303000-00016 [published Online First:  
44  
45 1983/03/01]  
46  
47  
48  
49 24. Nadler SB, Hidalgo JH, Bloch T. Prediction of blood volume in normal human adults.  
50  
51 *Surgery* 1962;51(2):224-32. [published Online First: 1962/02/01]  
52  
53  
54 25. Page VJ, Ely EW, Gates S, et al. Effect of intravenous haloperidol on the duration of delirium  
55  
56 and coma in critically ill patients (Hope-ICU): a randomised, double-blind, placebo-  
57  
58 controlled trial. *The Lancet Respiratory Medicine* 2013;1(7):515-23. doi:  
59  
60



- 1  
2  
3  
4 10.1016/s2213-2600(13)70166-8  
5  
6  
7 26. Elias DM, Ouellet J-F. Intraperitoneal Chemohyperthermia. *Surgical Oncology Clinics of*  
8  
9 *North America* 2001;10(4):915-33. doi: 10.1016/s1055-3207(18)30039-5  
10  
11  
12 27. Morano WF, Khalili M, Chi DS, et al. Clinical studies in CRS and HIPEC: Trials, tribulations,  
13  
14 and future directions-A systematic review. *J Surg Oncol* 2018;117(2):245-59. doi:  
15  
16 10.1002/jso.24813 [published Online First: 2017/11/10]  
17  
18  
19 28. Sugarbaker PH. Peritonectomy procedures. *Ann Surg* 1995;221(1):29-42. doi:  
20  
21 10.1097/0000658-199501000-00004 [published Online First: 1995/01/01]  
22  
23  
24 29. Thomas D, Wee M, Clyburn P, et al. Blood transfusion and the anaesthetist: management  
25  
26 of massive haemorrhage. *Anaesthesia* 2010;65(11):1153-61. doi: 10.1111/j.1365-  
27  
28 2044.2010.06538.x  
29  
30  
31  
32 30. Samama CM, Leroux G, Fléron M-H, et al. Point-of-care versus central laboratory  
33  
34 coagulation testing during haemorrhagic surgery. *Thrombosis and Haemostasis*  
35  
36 2017;101(02):394-401. doi: 10.1160/th08-06-0383  
37  
38  
39  
40 31. Davenport R, Manson J, De'Ath H, et al. Functional definition and characterization of acute  
41  
42 traumatic coagulopathy. *Crit Care Med* 2011;39(12):2652-8. doi:  
43  
44 10.1097/CCM.0b013e3182281af5 [published Online First: 2011/07/19]  
45  
46  
47  
48 32. Gorlinger K, Shore-Lesserson L, Dirkmann D, et al. Management of hemorrhage in  
49  
50 cardiothoracic surgery. *J Cardiothorac Vasc Anesth* 2013;27(4 Suppl):S20-34. doi:  
51  
52 10.1053/j.jvca.2013.05.014 [published Online First: 2013/08/09]  
53  
54  
55  
56 33. Konstantinidi A, Sokou R, Parastatidou S, et al. Clinical Application of  
57  
58 Thromboelastography/Thromboelastometry (TEG/TEM) in the Neonatal Population: A  
59  
60

- 1  
2  
3  
4 Narrative Review. *Semin Thromb Hemost* 2019;45(5):449-57. doi: 10.1055/s-0039-  
5  
6 1692210 [published Online First: 2019/06/14]  
7  
8  
9 34. Wikkelsø A, Wetterslev J, Møller AM, et al. Thromboelastography (TEG) or  
10  
11 thromboelastometry (ROTEM) to monitor haemostatic treatment versus usual care in  
12  
13 adults or children with bleeding. *Cochrane Database of Systematic Reviews* 2016 doi:  
14  
15 10.1002/14651858.CD007871.pub3  
16  
17  
18 35. Mallett S, Abeyesundara L, Clevenger B. Point-of-Care Testing in Liver Disease and Liver  
19  
20 Surgery. *Seminars in Thrombosis and Hemostasis* 2017;43(04):407-15. doi:  
21  
22 10.1055/s-0037-1599154  
23  
24  
25 36. Tanaka K, Bolliger D. Point-of-Care Coagulation Testing in Cardiac Surgery. *Seminars in*  
26  
27 *Thrombosis and Hemostasis* 2017;43(04):386-96. doi: 10.1055/s-0037-1599153  
28  
29  
30  
31 37. Teoh DA, Hutton MJH, Else S, et al. Epidural analgesia? A prospective analysis of  
32  
33 perioperative coagulation in cytoreductive surgery and hyperthermic intraperitoneal  
34  
35 chemotherapy. *The American Journal of Surgery* 2019;217(5):887-92. doi:  
36  
37 10.1016/j.amjsurg.2019.01.034  
38  
39  
40  
41 38. Esquivel J, Angulo F, Bland RK, et al. Hemodynamic and cardiac function parameters  
42  
43 during heated intraoperative intraperitoneal chemotherapy using the open "coliseum  
44  
45 technique". *Ann Surg Oncol* 2000;7(4):296-300. doi: 10.1007/s10434-000-0296-2  
46  
47 [published Online First: 2000/05/20]  
48  
49  
50  
51 39. Kanakoudis F, Petrou A, Michaloudis D, et al. Anaesthesia for intra-peritoneal perfusion of  
52  
53 hyperthermic chemotherapy. Haemodynamic changes, oxygen consumption and  
54  
55 delivery. *Anaesthesia* 1996;51(11):1033-6. doi: 10.1111/j.1365-2044.1996.tb14998.x  
56  
57  
58  
59  
60

[published Online First: 1996/11/01]

40. Murphy GJ, Reeves BC, Rogers CA, et al. Increased Mortality, Postoperative Morbidity, and Cost After Red Blood Cell Transfusion in Patients Having Cardiac Surgery. *Circulation* 2007;116(22):2544-52. doi: 10.1161/circulationaha.107.698977
41. Marik PE, Corwin HL. Efficacy of red blood cell transfusion in the critically ill: A systematic review of the literature\*. *Critical Care Medicine* 2008;36(9):2667-74. doi: 10.1097/CCM.0b013e3181844677
42. Reeves BC, Murphy GJ. Increased mortality, morbidity, and cost associated with red blood cell transfusion after cardiac surgery. *Current Opinion in Anaesthesiology* 2008;21(5):669-73. doi: 10.1097/ACO.0b013e32830dd087
43. Bjursten H, Dardashti A, Ederoth P, et al. Increased long-term mortality with plasma transfusion after coronary artery bypass surgery. *Intensive Care Medicine* 2012;39(3):437-44. doi: 10.1007/s00134-012-2723-9
44. International Committee of Medical Journal Editors (ICMJE): Uniform Requirements for Manuscripts Submitted to Biomedical Journals: writing and editing for biomedical publication. *Haematologica* 2004;89(3):264. [published Online First: 2004/03/17]

## Figure 1

Study flow diagram of the TEG-BT vs T-BT trial.

TEG-BT, thromboelastography-guided blood product transfusion therapy; T-BT, traditional blood product transfusion therapy; CRS/HIPEC, cytoreductive surgery combined with hyperthermic intraperitoneal chemotherapy.

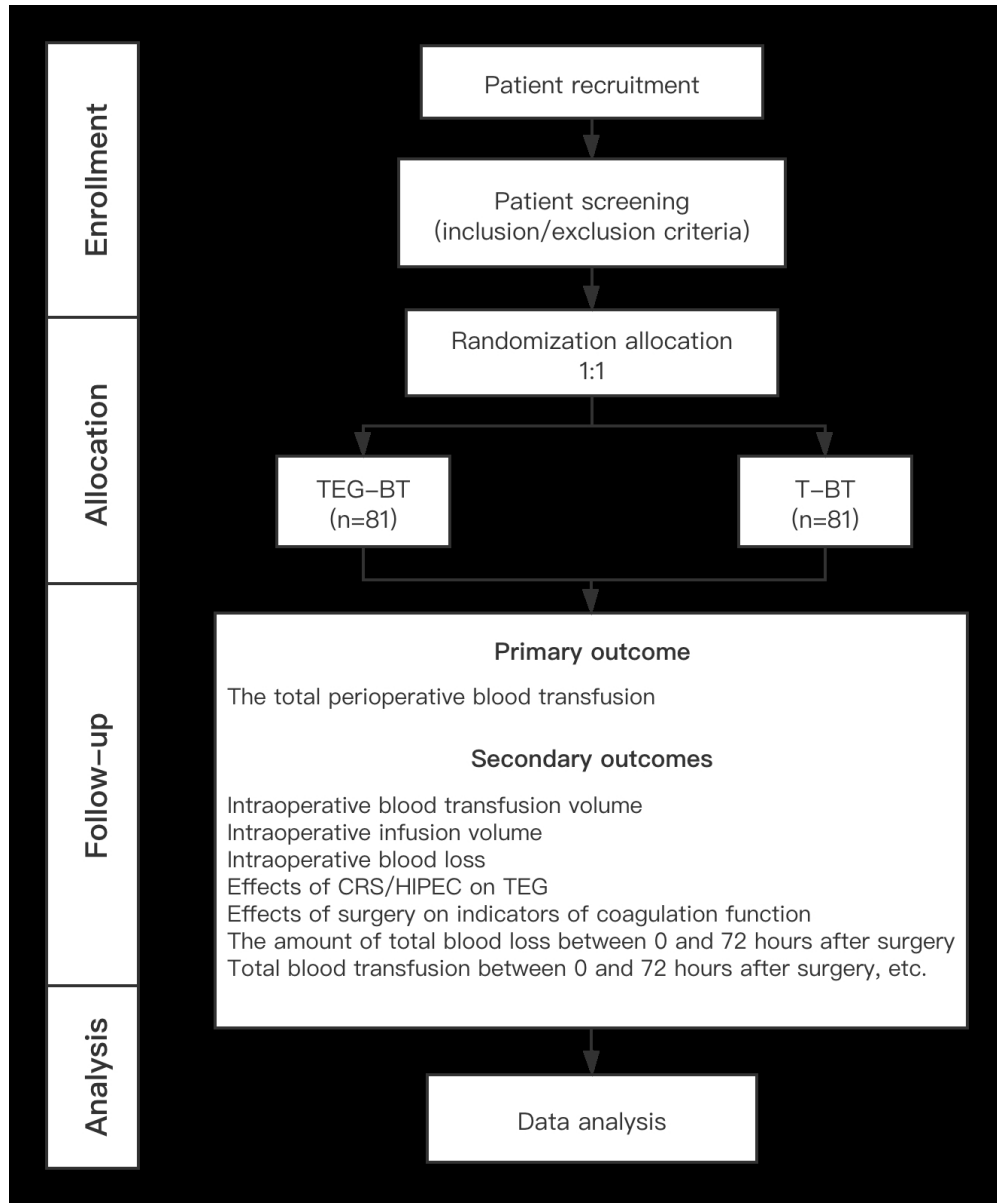

Figure 1. Study flow diagram of the TEG-BT vs T-BT trial.

467x561mm (72 x 72 DPI)

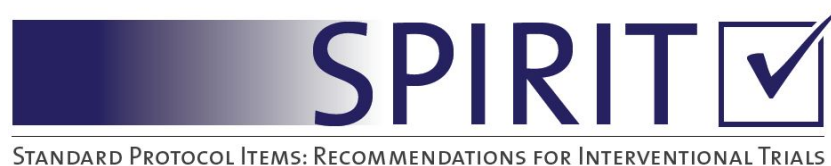

STANDARD PROTOCOL ITEMS: RECOMMENDATIONS FOR INTERVENTIONAL TRIALS

SPIRIT 2013 Checklist: Recommended items to address in a clinical trial protocol and related documents\*

| Section/item                      | Item No | Description                                                                                                                                                                                                                                                                              | Addressed on page number |
|-----------------------------------|---------|------------------------------------------------------------------------------------------------------------------------------------------------------------------------------------------------------------------------------------------------------------------------------------------|--------------------------|
| <b>Administrative information</b> |         |                                                                                                                                                                                                                                                                                          |                          |
| Title                             | 1       | Descriptive title identifying the study design, population, interventions, and, if applicable, trial acronym                                                                                                                                                                             | ___ 1 ___                |
| Trial registration                | 2a      | Trial identifier and registry name. If not yet registered, name of intended registry                                                                                                                                                                                                     | ___ 3, 16 ___            |
|                                   | 2b      | All items from the World Health Organization Trial Registration Data Set                                                                                                                                                                                                                 | ___ N/A ___              |
| Protocol version                  | 3       | Date and version identifier                                                                                                                                                                                                                                                              | ___ N/A ___              |
| Funding                           | 4       | Sources and types of financial, material, and other support                                                                                                                                                                                                                              | ___ 17 ___               |
| Roles and responsibilities        | 5a      | Names, affiliations, and roles of protocol contributors                                                                                                                                                                                                                                  | ___ 1, 17 ___            |
|                                   | 5b      | Name and contact information for the trial sponsor                                                                                                                                                                                                                                       | ___ N/A ___              |
|                                   | 5c      | Role of study sponsor and funders, if any, in study design; collection, management, analysis, and interpretation of data; writing of the report; and the decision to submit the report for publication, including whether they will have ultimate authority over any of these activities | ___ N/A ___              |
|                                   | 5d      | Composition, roles, and responsibilities of the coordinating centre, steering committee, endpoint adjudication committee, data management team, and other individuals or groups overseeing the trial, if applicable (see Item 21a for data monitoring committee)                         | ___ N/A ___              |

1 **Introduction**

2

3 Background and rationale 6a Description of research question and justification for undertaking the trial, including summary of relevant studies (published and unpublished) examining benefits and harms for each intervention \_\_\_\_\_ 4-6 \_\_\_\_\_

4

5

6 6b Explanation for choice of comparators \_\_\_\_\_ N/A \_\_\_\_\_

7

8 Objectives 7 Specific objectives or hypotheses \_\_\_\_\_ 6 \_\_\_\_\_

9

10 Trial design 8 Description of trial design including type of trial (eg, parallel group, crossover, factorial, single group), allocation ratio, and framework (eg, superiority, equivalence, noninferiority, exploratory) \_\_\_\_\_ 6 \_\_\_\_\_

11

12

13

14 **Methods: Participants, interventions, and outcomes**

15

16 Study setting 9 Description of study settings (eg, community clinic, academic hospital) and list of countries where data will be collected. Reference to where list of study sites can be obtained \_\_\_\_\_ N/A \_\_\_\_\_

17

18

19 Eligibility criteria 10 Inclusion and exclusion criteria for participants. If applicable, eligibility criteria for study centres and individuals who will perform the interventions (eg, surgeons, psychotherapists) \_\_\_\_\_ 6, 7 \_\_\_\_\_

20

21

22 Interventions 11a Interventions for each group with sufficient detail to allow replication, including how and when they will be administered \_\_\_\_\_ 8, 9 \_\_\_\_\_

23

24

25 11b Criteria for discontinuing or modifying allocated interventions for a given trial participant (eg, drug dose change in response to harms, participant request, or improving/worsening disease) \_\_\_ 8, 9, 11, 12 \_\_\_

26

27

28 11c Strategies to improve adherence to intervention protocols, and any procedures for monitoring adherence (eg, drug tablet return, laboratory tests) \_\_\_\_\_ N/A \_\_\_\_\_

29

30

31 11d Relevant concomitant care and interventions that are permitted or prohibited during the trial \_\_\_\_\_ N/A \_\_\_\_\_

32

33

34 Outcomes 12 Primary, secondary, and other outcomes, including the specific measurement variable (eg, systolic blood pressure), analysis metric (eg, change from baseline, final value, time to event), method of aggregation (eg, median, proportion), and time point for each outcome. Explanation of the clinical relevance of chosen efficacy and harm outcomes is strongly recommended \_\_\_\_\_ 9, 10, 11 \_\_\_\_\_

35

36

37

38

39

40 Participant timeline 13 Time schedule of enrolment, interventions (including any run-ins and washouts), assessments, and visits for participants. A schematic diagram is highly recommended (see Figure) \_\_\_\_\_ 9, 10, 11 \_\_\_\_\_

41

42

43

44

45

46

1 Sample size 14 Estimated number of participants needed to achieve study objectives and how it was determined, including \_\_\_\_\_ 12 \_\_\_\_\_  
 2 clinical and statistical assumptions supporting any sample size calculations

3  
 4 Recruitment 15 Strategies for achieving adequate participant enrolment to reach target sample size \_\_\_\_\_ N/A \_\_\_\_\_  
 5

6 **Methods: Assignment of interventions (for controlled trials)**

7  
 8 Allocation:

9  
 10 Sequence 16a Method of generating the allocation sequence (eg, computer-generated random numbers), and list of any \_\_\_\_\_ 7 \_\_\_\_\_  
 11 generation factors for stratification. To reduce predictability of a random sequence, details of any planned restriction  
 12 (eg, blocking) should be provided in a separate document that is unavailable to those who enrol participants  
 13 or assign interventions  
 14

15  
 16 Allocation 16b Mechanism of implementing the allocation sequence (eg, central telephone; sequentially numbered, \_\_\_\_\_ 7 \_\_\_\_\_  
 17 concealment opaque, sealed envelopes), describing any steps to conceal the sequence until interventions are assigned  
 18 mechanism  
 19

20 Implementation 16c Who will generate the allocation sequence, who will enrol participants, and who will assign participants to \_\_\_\_\_ 7 \_\_\_\_\_  
 21 interventions  
 22

23 Blinding (masking) 17a Who will be blinded after assignment to interventions (eg, trial participants, care providers, outcome \_\_\_\_\_ 7 \_\_\_\_\_  
 24 assessors, data analysts), and how  
 25

26  
 27 17b If blinded, circumstances under which unblinding is permissible, and procedure for revealing a participant's \_\_\_\_\_ N/A \_\_\_\_\_  
 28 allocated intervention during the trial  
 29

30  
 31 **Methods: Data collection, management, and analysis**

32  
 33 Data collection 18a Plans for assessment and collection of outcome, baseline, and other trial data, including any related \_\_\_\_\_ 8, 12 \_\_\_\_\_  
 34 methods processes to promote data quality (eg, duplicate measurements, training of assessors) and a description of  
 35 study instruments (eg, questionnaires, laboratory tests) along with their reliability and validity, if known.  
 36 Reference to where data collection forms can be found, if not in the protocol  
 37

38  
 39 18b Plans to promote participant retention and complete follow-up, including list of any outcome data to be \_\_\_\_\_ N/A \_\_\_\_\_  
 40 collected for participants who discontinue or deviate from intervention protocols  
 41

|    |                                 |     |                                                                                                                                                                                                                                                                                                                                       |                   |
|----|---------------------------------|-----|---------------------------------------------------------------------------------------------------------------------------------------------------------------------------------------------------------------------------------------------------------------------------------------------------------------------------------------|-------------------|
| 1  | Data management                 | 19  | Plans for data entry, coding, security, and storage, including any related processes to promote data quality (eg, double data entry; range checks for data values). Reference to where details of data management procedures can be found, if not in the protocol                                                                     | _____ N/A _____   |
| 2  |                                 |     |                                                                                                                                                                                                                                                                                                                                       |                   |
| 3  |                                 |     |                                                                                                                                                                                                                                                                                                                                       |                   |
| 4  |                                 |     |                                                                                                                                                                                                                                                                                                                                       |                   |
| 5  | Statistical methods             | 20a | Statistical methods for analysing primary and secondary outcomes. Reference to where other details of the statistical analysis plan can be found, if not in the protocol                                                                                                                                                              | _____ 12-13 _____ |
| 6  |                                 |     |                                                                                                                                                                                                                                                                                                                                       |                   |
| 7  |                                 |     |                                                                                                                                                                                                                                                                                                                                       |                   |
| 8  |                                 | 20b | Methods for any additional analyses (eg, subgroup and adjusted analyses)                                                                                                                                                                                                                                                              | _____ N/A _____   |
| 9  |                                 |     |                                                                                                                                                                                                                                                                                                                                       |                   |
| 10 |                                 | 20c | Definition of analysis population relating to protocol non-adherence (eg, as randomised analysis), and any statistical methods to handle missing data (eg, multiple imputation)                                                                                                                                                       | _____ 12-13 _____ |
| 11 |                                 |     |                                                                                                                                                                                                                                                                                                                                       |                   |
| 12 |                                 |     |                                                                                                                                                                                                                                                                                                                                       |                   |
| 13 |                                 |     |                                                                                                                                                                                                                                                                                                                                       |                   |
| 14 | <b>Methods: Monitoring</b>      |     |                                                                                                                                                                                                                                                                                                                                       |                   |
| 15 |                                 |     |                                                                                                                                                                                                                                                                                                                                       |                   |
| 16 | Data monitoring                 | 21a | Composition of data monitoring committee (DMC); summary of its role and reporting structure; statement of whether it is independent from the sponsor and competing interests; and reference to where further details about its charter can be found, if not in the protocol. Alternatively, an explanation of why a DMC is not needed | _____ N/A _____   |
| 17 |                                 |     |                                                                                                                                                                                                                                                                                                                                       |                   |
| 18 |                                 |     |                                                                                                                                                                                                                                                                                                                                       |                   |
| 19 |                                 |     |                                                                                                                                                                                                                                                                                                                                       |                   |
| 20 |                                 |     |                                                                                                                                                                                                                                                                                                                                       |                   |
| 21 |                                 |     |                                                                                                                                                                                                                                                                                                                                       |                   |
| 22 |                                 | 21b | Description of any interim analyses and stopping guidelines, including who will have access to these interim results and make the final decision to terminate the trial                                                                                                                                                               | _____ N/A _____   |
| 23 |                                 |     |                                                                                                                                                                                                                                                                                                                                       |                   |
| 24 |                                 |     |                                                                                                                                                                                                                                                                                                                                       |                   |
| 25 | Harms                           | 22  | Plans for collecting, assessing, reporting, and managing solicited and spontaneously reported adverse events and other unintended effects of trial interventions or trial conduct                                                                                                                                                     | _____ 11-12 _____ |
| 26 |                                 |     |                                                                                                                                                                                                                                                                                                                                       |                   |
| 27 |                                 |     |                                                                                                                                                                                                                                                                                                                                       |                   |
| 28 | Auditing                        | 23  | Frequency and procedures for auditing trial conduct, if any, and whether the process will be independent from investigators and the sponsor                                                                                                                                                                                           | _____ 12 _____    |
| 29 |                                 |     |                                                                                                                                                                                                                                                                                                                                       |                   |
| 30 |                                 |     |                                                                                                                                                                                                                                                                                                                                       |                   |
| 31 |                                 |     |                                                                                                                                                                                                                                                                                                                                       |                   |
| 32 | <b>Ethics and dissemination</b> |     |                                                                                                                                                                                                                                                                                                                                       |                   |
| 33 |                                 |     |                                                                                                                                                                                                                                                                                                                                       |                   |
| 34 | Research ethics approval        | 24  | Plans for seeking research ethics committee/institutional review board (REC/IRB) approval                                                                                                                                                                                                                                             | _____ 16 _____    |
| 35 |                                 |     |                                                                                                                                                                                                                                                                                                                                       |                   |
| 36 |                                 |     |                                                                                                                                                                                                                                                                                                                                       |                   |
| 37 | Protocol amendments             | 25  | Plans for communicating important protocol modifications (eg, changes to eligibility criteria, outcomes, analyses) to relevant parties (eg, investigators, REC/IRBs, trial participants, trial registries, journals, regulators)                                                                                                      | _____ 16 _____    |
| 38 |                                 |     |                                                                                                                                                                                                                                                                                                                                       |                   |
| 39 |                                 |     |                                                                                                                                                                                                                                                                                                                                       |                   |
| 40 |                                 |     |                                                                                                                                                                                                                                                                                                                                       |                   |
| 41 |                                 |     |                                                                                                                                                                                                                                                                                                                                       |                   |
| 42 |                                 |     |                                                                                                                                                                                                                                                                                                                                       |                   |
| 43 |                                 |     |                                                                                                                                                                                                                                                                                                                                       |                   |
| 44 |                                 |     |                                                                                                                                                                                                                                                                                                                                       |                   |
| 45 |                                 |     |                                                                                                                                                                                                                                                                                                                                       |                   |
| 46 |                                 |     |                                                                                                                                                                                                                                                                                                                                       |                   |



|    |                               |     |                                                                                                                                                                                                                                                                                     |                  |
|----|-------------------------------|-----|-------------------------------------------------------------------------------------------------------------------------------------------------------------------------------------------------------------------------------------------------------------------------------------|------------------|
| 1  | Consent or assent             | 26a | Who will obtain informed consent or assent from potential trial participants or authorised surrogates, and how (see Item 32)                                                                                                                                                        | _____16_____     |
| 2  |                               |     |                                                                                                                                                                                                                                                                                     |                  |
| 3  |                               |     |                                                                                                                                                                                                                                                                                     |                  |
| 4  |                               | 26b | Additional consent provisions for collection and use of participant data and biological specimens in ancillary studies, if applicable                                                                                                                                               | _____N/A_____    |
| 5  |                               |     |                                                                                                                                                                                                                                                                                     |                  |
| 6  |                               |     |                                                                                                                                                                                                                                                                                     |                  |
| 7  | Confidentiality               | 27  | How personal information about potential and enrolled participants will be collected, shared, and maintained in order to protect confidentiality before, during, and after the trial                                                                                                | _____16_____     |
| 8  |                               |     |                                                                                                                                                                                                                                                                                     |                  |
| 9  |                               |     |                                                                                                                                                                                                                                                                                     |                  |
| 10 | Declaration of interests      | 28  | Financial and other competing interests for principal investigators for the overall trial and each study site                                                                                                                                                                       | _____17_____     |
| 11 |                               |     |                                                                                                                                                                                                                                                                                     |                  |
| 12 |                               |     |                                                                                                                                                                                                                                                                                     |                  |
| 13 | Access to data                | 29  | Statement of who will have access to the final trial dataset, and disclosure of contractual agreements that limit such access for investigators                                                                                                                                     | _____16, 17_____ |
| 14 |                               |     |                                                                                                                                                                                                                                                                                     |                  |
| 15 |                               |     |                                                                                                                                                                                                                                                                                     |                  |
| 16 | Ancillary and post-trial care | 30  | Provisions, if any, for ancillary and post-trial care, and for compensation to those who suffer harm from trial participation                                                                                                                                                       | _____N/A_____    |
| 17 |                               |     |                                                                                                                                                                                                                                                                                     |                  |
| 18 |                               |     |                                                                                                                                                                                                                                                                                     |                  |
| 19 |                               |     |                                                                                                                                                                                                                                                                                     |                  |
| 20 | Dissemination policy          | 31a | Plans for investigators and sponsor to communicate trial results to participants, healthcare professionals, the public, and other relevant groups (eg, via publication, reporting in results databases, or other data sharing arrangements), including any publication restrictions | _____16, 17_____ |
| 21 |                               |     |                                                                                                                                                                                                                                                                                     |                  |
| 22 |                               |     |                                                                                                                                                                                                                                                                                     |                  |
| 23 |                               |     |                                                                                                                                                                                                                                                                                     |                  |
| 24 |                               | 31b | Authorship eligibility guidelines and any intended use of professional writers                                                                                                                                                                                                      | _____17_____     |
| 25 |                               |     |                                                                                                                                                                                                                                                                                     |                  |
| 26 |                               | 31c | Plans, if any, for granting public access to the full protocol, participant-level dataset, and statistical code                                                                                                                                                                     | _____18_____     |
| 27 |                               |     |                                                                                                                                                                                                                                                                                     |                  |
| 28 |                               |     |                                                                                                                                                                                                                                                                                     |                  |
| 29 | <b>Appendices</b>             |     |                                                                                                                                                                                                                                                                                     |                  |
| 30 |                               |     |                                                                                                                                                                                                                                                                                     |                  |
| 31 | Informed consent materials    | 32  | Model consent form and other related documentation given to participants and authorised surrogates                                                                                                                                                                                  | _____N/A_____    |
| 32 |                               |     |                                                                                                                                                                                                                                                                                     |                  |
| 33 |                               |     |                                                                                                                                                                                                                                                                                     |                  |
| 34 | Biological specimens          | 33  | Plans for collection, laboratory evaluation, and storage of biological specimens for genetic or molecular analysis in the current trial and for future use in ancillary studies, if applicable                                                                                      | _____N/A_____    |
| 35 |                               |     |                                                                                                                                                                                                                                                                                     |                  |
| 36 |                               |     |                                                                                                                                                                                                                                                                                     |                  |

37 \*It is strongly recommended that this checklist be read in conjunction with the SPIRIT 2013 Explanation & Elaboration for important clarification on the items.  
 38 Amendments to the protocol should be tracked and dated. The SPIRIT checklist is copyrighted by the SPIRIT Group under the Creative Commons  
 39 "[Attribution-NonCommercial-NoDerivs 3.0 Unported](https://creativecommons.org/licenses/by-nc-nd/3.0/)" license.  
 40  
 41  
 42

# BMJ Open

## Thromboelastography-guided blood transfusion during cytoreductive surgery combined with hyperthermic intraperitoneal chemotherapy: study protocol for a prospective randomized controlled trial

|                                 |                                                                                                                                                                                                                                                                                                                                                                                                                                                                                                                                                                                       |
|---------------------------------|---------------------------------------------------------------------------------------------------------------------------------------------------------------------------------------------------------------------------------------------------------------------------------------------------------------------------------------------------------------------------------------------------------------------------------------------------------------------------------------------------------------------------------------------------------------------------------------|
| Journal:                        | <i>BMJ Open</i>                                                                                                                                                                                                                                                                                                                                                                                                                                                                                                                                                                       |
| Manuscript ID                   | bmjopen-2020-042741.R1                                                                                                                                                                                                                                                                                                                                                                                                                                                                                                                                                                |
| Article Type:                   | Protocol                                                                                                                                                                                                                                                                                                                                                                                                                                                                                                                                                                              |
| Date Submitted by the Author:   | 02-Sep-2020                                                                                                                                                                                                                                                                                                                                                                                                                                                                                                                                                                           |
| Complete List of Authors:       | Wang, Shaoheng; Capital Medical University Affiliated Beijing Shijitan Hospital, Department of Anesthesiology<br>Zhang, Qing; Capital Medical University Affiliated Beijing Shijitan Hospital, Department of Anesthesiology<br>Chen, Linfeng; Capital Medical University Affiliated Beijing Shijitan Hospital, Department of Blood Transfusion<br>Liu, Gang; Capital Medical University Affiliated Beijing Shijitan Hospital, Department of Peritoneal Cancer Surgery<br>Liu, Peng fei; Capital Medical University Affiliated Beijing Shijitan Hospital, Department of Anesthesiology |
| <b>Primary Subject Heading</b>: | Anaesthesia                                                                                                                                                                                                                                                                                                                                                                                                                                                                                                                                                                           |
| Secondary Subject Heading:      | Haematology (incl blood transfusion), Gastroenterology and hepatology                                                                                                                                                                                                                                                                                                                                                                                                                                                                                                                 |
| Keywords:                       | Bleeding disorders & coagulopathies < HAEMATOLOGY, Anaesthesia in oncology < ANAESTHETICS, Gastrointestinal tumours < GASTROENTEROLOGY                                                                                                                                                                                                                                                                                                                                                                                                                                                |
|                                 |                                                                                                                                                                                                                                                                                                                                                                                                                                                                                                                                                                                       |

SCHOLARONE™  
Manuscripts

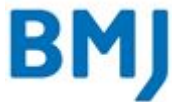

I, the Submitting Author has the right to grant and does grant on behalf of all authors of the Work (as defined in the below author licence), an exclusive licence and/or a non-exclusive licence for contributions from authors who are: i) UK Crown employees; ii) where BMJ has agreed a CC-BY licence shall apply, and/or iii) in accordance with the terms applicable for US Federal Government officers or employees acting as part of their official duties; on a worldwide, perpetual, irrevocable, royalty-free basis to BMJ Publishing Group Ltd ("BMJ") its licensees and where the relevant Journal is co-owned by BMJ to the co-owners of the Journal, to publish the Work in this journal and any other BMJ products and to exploit all rights, as set out in our [licence](#).

The Submitting Author accepts and understands that any supply made under these terms is made by BMJ to the Submitting Author unless you are acting as an employee on behalf of your employer or a postgraduate student of an affiliated institution which is paying any applicable article publishing charge ("APC") for Open Access articles. Where the Submitting Author wishes to make the Work available on an Open Access basis (and intends to pay the relevant APC), the terms of reuse of such Open Access shall be governed by a Creative Commons licence – details of these licences and which [Creative Commons](#) licence will apply to this Work are set out in our licence referred to above.

Other than as permitted in any relevant BMJ Author's Self Archiving Policies, I confirm this Work has not been accepted for publication elsewhere, is not being considered for publication elsewhere and does not duplicate material already published. I confirm all authors consent to publication of this Work and authorise the granting of this licence.

**Title:**

Thromboelastography-guided blood transfusion during cytoreductive surgery combined with hyperthermic intraperitoneal chemotherapy: study protocol for a prospective randomized controlled trial.

**Authors:**

Shaoheng Wang<sup>1</sup>, M.D., Department of Anaesthesiology, Beijing Shijitan Hospital, Capital Medical University, Beijing, China.

Qing Zhang<sup>1</sup>, M.D., Department of Anaesthesiology, Beijing Shijitan Hospital, Capital Medical University, Beijing, China.

Linfeng Chen<sup>2</sup>, M.D., Department of Blood Transfusion, Beijing Shijitan Hospital, Capital Medical University, Beijing, China.

Gang Liu<sup>3</sup>, M.D., Department of Peritoneal Cancer Surgery, Beijing Shijitan Hospital, Capital Medical University, Beijing, China.

Pengfei Liu<sup>1</sup>, M.D., Department of Anaesthesiology, Beijing Shijitan Hospital, Capital Medical University, Beijing, China.

**Corresponding author contact details:**

Pengfei Liu, M.D., Professor,

Department of Anaesthesiology, Beijing Shijitan Hospital, Capital Medical University, Beijing 100038, China.

Phone: (86) 010 63926501.

Fax: (86) 010 63926507.

E-mail: sfflpf@126.com.

**Key words:**

Cytoreductive surgery, Hyperthermic intraperitoneal chemotherapy, Thromboelastography, Blood transfusion

**Word count:** 4027

## Abstract

### Introduction

Cytoreductive surgery combined with hyperthermic intraperitoneal chemotherapy (CRS/HIPEC) is a well-established treatment for peritoneal cancer. However, this kind of combination therapy is connected to a high incidence of complications. Moreover, relative studies have indicated that traditional laboratory testing is insufficient to demonstrate the overall haemostatic physiology of CRS/HIPEC. Thromboelastography (TEG), administered by monitoring dynamic changes in haemostasis, has been shown to contribute to reducing transfusion requirements and improving survival. However, there is no evidence to verify whether TEG can be applied to guide transfusion strategies during CRS/HIPEC. Therefore, we aim to investigate whether TEG-guided blood product transfusion (TEG-BT) therapy is superior to traditional blood product transfusion (T-BT) therapy for guiding perioperative blood transfusion treatment and improving the prognosis of patients undergoing CRS/HIPEC.

### Methods and analysis

The TEG-BT versus T-BT study is a single-centre, randomized, blinded outcome assessment clinical trial of 162 peritoneal cancer patients aged 18-64 years undergoing CRS/HIPEC. Participants will be randomly allocated to receive TEG-BT or T-BT. The primary outcome will be the evaluation of perioperative blood transfusion, which refers to the total amount of blood transfusion given from the time patients enter the operating room up to 72 hours post-operatively. The secondary outcomes will include the transfusion volume during surgery, total amount of intraoperative infusion, amount of blood lost during the operation, total blood transfusion between 0 and 72 hours after surgery, lowest haemoglobin level within 72 hours after surgery, intensive care unit duration, overall length of stay, total cost of hospitalization and adverse events. Data will be analysed according to the intention-to-treat principle.

**Ethical approval and dissemination** The study protocol has been approved by the Scientific Research Ethics Committee of Beijing Shijitan Hospital Affiliated with

Capital Medical University (Approval Number: sjtkyll-lx-2020-3). The results will be published in peer-reviewed journals.

**Trial registration number** ChiCTR2000028835

### **Strengths and limitations of this study**

- This is a randomized, controlled, blinded outcome assessment trial to test the efficacy of thromboelastography (TEG)-guided blood transfusion in cytoreductive surgery combined with hyperthermic intraperitoneal chemotherapy (CRS/HIPEC).
- The results of this study will improve a more goal-oriented transfusion strategy to reduce intraoperative blood transfusion, stabilize the perioperative coagulation function and lighten the economic burden.
- Future studies should address the importance of the relationship between transfusion thresholds and TEG parameters for the optimal management of coagulopathy.
- This is a single-centre trial, which may limit the generalization of conclusions; consequently, multicentre clinical studies with a larger sample size will be required.
- Although there is no way for anaesthesiologists to be blinded during the trial, the main outcome evaluators will be blinded.

## BACKGROUND

Peritoneal cancer (PC) was previously considered to be a fatal stage of many gastrointestinal malignancies. Patients receiving palliative care had a median survival of 3 to 9 months, depending on the initial stage<sup>1</sup>. Significant progress has been made in the treatment of peritoneal malignancies over the past decade, and increasing evidence supports the use of cytoreductive surgery combined with hyperthermic intraperitoneal chemotherapy (CRS/HIPEC) in an attempt to eradicate the disease macroscopically or microscopically and reduce peritoneal recurrence<sup>2</sup>. Currently, CRS/HIPEC is an established treatment for pseudomyxoma peritonei, colorectal cancer, ovarian cancer, and gastric cancer with intraperitoneal metastasis<sup>3</sup>. The number of patients receiving CRS/HIPEC is expected to rise due to the high mortality of PC and the encouraging long-term benefits of treatment<sup>4</sup>.

Although positive results have been observed in the treatment of tumour disease, CRS/HIPEC is characterized by a high incidence of complications that challenge both intraoperative and postoperative management<sup>5</sup>. Patients undergo CRS/HIPEC with significant fluid and blood loss, as well as chemotherapy and severe fluctuations in the core temperature<sup>6</sup>. Schmidt et al reported that CRS/HIPEC is a long and intricate surgical procedure accompanied by massive blood and fluid loss, with 51% of patients requiring a blood transfusion<sup>7</sup>. Massive intraoperative bleeding and the above factors will certainly lead to severe coagulation disorders. Intraoperative coagulation is a known complication of extensive surgery and HIPEC and may be caused by a combination of the high fluid requirements for resuscitation, direct effects of intraperitoneal chemotherapy, hepatotoxicity due to antitumour drugs, and direct liver injury<sup>8</sup>. Coagulation problems can be part of a series of events that can lead to massive blood loss during surgery, which can compromise the quality of the procedure, increase the need for blood transfusions, and compromise the patient's postoperative process<sup>9</sup>. Therefore, perioperative management of patients undergoing CRS/HIPEC is a challenge for surgeons, anaesthesiologists and critical care physicians<sup>10</sup>.

Regarding the perioperative monitoring of coagulation function, the management

1  
2  
3  
4 of coagulation disorders at 90% of HIPEC centres is guided by standard laboratory  
5 tests (SLTs), such as the activated partial thromboplastin time (APTT), prothrombin  
6 time (PT), or international normalized ratio (INR)<sup>11</sup>. Laboratory analysis shows that  
7 with an increase in the INR, coagulation disorders are observed, antithrombin III (AT  
8 III) and fibrinogen values are reduced, APTT is prolonged, and the number of  
9 coagulation cells is reduced<sup>12</sup>. Originally invented by Hartert in 1948,  
10 thromboelastography (TEG) is a viscoelastic, haemostatic assay analyser that imitates  
11 sluggish venous flow<sup>13</sup>. It is a different test from standard coagulation tests in that it  
12 measures the viscoelastic properties of whole blood as it clots, providing  
13 comprehensive information about the dynamics of clot development, stabilization and  
14 dissolution and assesses both thrombosis and fibrinolysis<sup>14 15</sup>. TEG has been used  
15 increasingly in intensive care units (ICUs) and in cases of acute critical surgery to  
16 evaluate coagulation disorders and guide the infusion of blood products for critically  
17 ill patients<sup>16</sup>. The technique has been tested in clinical scenarios such as heart and  
18 liver surgery and transplantation to reduce the number of transfusions and serve as a  
19 screening tool for patients managing hypercoagulant and bleeding disorders<sup>17</sup>. One  
20 study has shown that the PT, APTT and platelet (PLT) count are insufficient to  
21 demonstrate the effect of surgical stress, hyperthermia, chemotherapy and mass fluid  
22 transfer on the overall haemostatic physiology of CRS/HIPEC, while more  
23 sophisticated TEG monitoring is more accurate for perioperative coagulation function  
24 monitoring<sup>18</sup>. Another study reported that although traditional clinical monitoring of  
25 coagulation disorders was not meaningful in CRS/HIPEC, TEG monitoring confirmed  
26 that epidural analgesia after CRS/HIPEC was safe<sup>19</sup>. However, whether the effect of  
27 CRS/HIPEC on coagulation function can be treated according to TEG guidance and  
28 the infusion of various blood products can be guided according to changes in TEG  
29 and thereby achieve better outcomes for patients has not been fully verified.

30  
31  
32  
33  
34  
35  
36  
37  
38  
39  
40  
41  
42  
43  
44  
45  
46  
47  
48  
49  
50  
51  
52  
53  
54 Based on the existing literature, we aim to investigate the advantages of  
55 TEG-guided blood product transfusion (TEG-BT) in perioperative blood protection  
56 during CRS/HIPEC. Our working hypothesis is that compared with traditional blood  
57 product transfusion (T-BT) patients, TEG-BT patients receive fewer transfusions of  
58  
59  
60



1  
2  
3  
4 intraoperative blood products and exhibit a more stable perioperative coagulation  
5 function, no reduction in postoperative haemoglobin (HGB) levels and coagulation  
6 function, shorter hospital stays, and no increase in the incidence of adverse reactions.  
7  
8

## 9 **METHODS AND ANALYSIS**

### 11 **Trial design**

12  
13 The trial will be conducted at Beijing Shijitan Hospital, Capital Medical University in  
14 Beijing, China. The study started recruiting patients in May 2020 and will continue  
15 for one year. The TEG-BT versus T-BT study is a single-centre, randomized, blinded  
16 outcome assessment clinical trial that conforms to the Consolidated Standards of  
17 Reporting Trials<sup>20</sup>. CRS/HIPEC is planned for two groups of patients, and TEG-BT or  
18 T-BT is adopted for perioperative blood transfusion management. The ratio of the two  
19 groups is 1:1 (Figure 1).  
20  
21  
22  
23  
24  
25  
26

### 27 **Objectives**

28  
29 The purpose of this study is to verify whether TEG-BT is better than T-BT for  
30 perioperative blood transfusion treatment and the prognosis of patients undergoing  
31 CRS/HIPEC.  
32  
33

### 34 **Participants**

#### 35 **Inclusion criteria**

36  
37 Patients who meet all of the following criteria are eligible for inclusion:  
38  
39

- 40 1. Age of 18-64 years
  - 41 2. American Society of Anaesthesiologists (ASA) grade I or II
  - 42 3. Well-established histologic diagnosis of peritoneal disease
  - 43 4. Performance of CRS/HIPEC under general anaesthesia
  - 44 5. Written consent to participate in the study
- 45  
46  
47  
48  
49

#### 50 **Exclusion criteria**

- 51 1. Anaemia: HGB<9g/dl
  - 52 2. Abnormal coagulation function before surgery
  - 53 3. Uncontrolled systemic infections
  - 54 4. Antiplatelet or anticoagulant therapy was administered at enrollment or  
55 discontinued for less than 7 days prior to study evaluation
- 56  
57  
58  
59  
60

- 1
- 2
- 3
- 4 5. Thrombotic events: Any blood clot in the vein or artery has been recorded before
- 5 or at present
- 6
- 7
- 8 6. Severe cardiopulmonary disease
- 9
- 10 7. Hepatic or renal failure
- 11
- 12 8. Pregnancy or lactation
- 13
- 14 9. Patient refusal to sign the informed consent form
- 15
- 16 10. Patient participation in another clinical-treatment study

### 17 **Randomization and blinding**

18 All participants will be randomly divided into two groups: TEG-BT for the  
19 experimental group and T-BT for the control group. Before the study begins, an  
20 independent investigator who is not exposed to any of the participants will use a  
21 simple randomized method to divide the two groups in a 1:1 ratio. The random  
22 numbers will be saved in sealed opaque envelopes. Before surgery, the  
23 anaesthesiologist will evaluate the patient, and after the informed consent form is  
24 signed, the envelope will be opened to obtain the grouping information of the patient.  
25 Blood transfusion will be performed intraoperatively according to the grouping of the  
26 patients. After the operation, independent follow-up staff will collect the data of the  
27 patients during and after the operation according to the electronic medical record  
28 system. During the whole experiment, the anaesthesiologists will be aware of the  
29 patient grouping information, but they will not participate in the postoperative  
30 follow-up and data collection. Other individuals and personnel involved, including  
31 patients, surgeons, data collectors, etc., will not know the grouping information.

### 32 **Anaesthesia management**

33 The anaesthesia regimen will be consistent between the two groups. Venous access  
34 will be open in all patients in the preparation room, and midazolam will be  
35 administered (0.05 mg/kg intravenously) to the patients before they enter the  
36 operating room. Upon arrival in the operating room, standard monitoring (pulse  
37 oximetry, electrocardiogram, and noninvasive arterial blood pressure monitoring) will  
38 be established. Sufentanil 0.5 µg/kg, propofol 2.5 mg/kg and rocuronium 0.6 mg/kg  
39 will be adopted for general anaesthesia induction. After endotracheal intubation, the  
40  
41  
42  
43  
44  
45  
46  
47  
48  
49  
50  
51  
52  
53  
54  
55  
56  
57  
58  
59  
60

1  
2  
3  
4 lungs will be aerated with 50% oxygen and 50% air mixture, and the ventilation level  
5 will be adjusted to maintain normocapnia. Radial artery and internal jugular vein  
6 puncture will be performed to monitor the invasive arterial pressure and central  
7 venous pressure. We will perform an ultrasound-guided bilateral rectus sheath  
8 blockade, and 0.375% ropivacaine will be given for analgesia on both sides.  
9 Anaesthesia will be maintained with inhalation of sevoflurane and IV remifentanyl,  
10 and muscle relaxation will be maintained with IV rocuronium. Postoperative  
11 intravenous injection of atropine 0.01 mg/kg and neostigmine 0.05 mg/kg will be used  
12 to antagonize residual neuromuscular block. Extubation will be performed after  
13 confirming that the patient's eyes are open and that he or she exhibits adequate  
14 spontaneous breathing and purposeful movement.  
15  
16  
17  
18  
19  
20  
21  
22  
23  
24

### 25 **Intraoperative intervention**

26  
27 All enrolled patients will be assigned to one of the following two study groups. For  
28 patients in the T-BT group, the anaesthesiologist will inject blood products according  
29 to his or her clinical judgement. Patients entering the TEG-BT group will undergo  
30 TEG monitoring 4 times before surgery, during CRS, before HIPEC and after HIPEC,  
31 and blood products such as erythrocytes, plasma, PLTs, prothrombin complex and  
32 fibrinogen will be administered according to the monitoring results. The two groups  
33 of patients will be given red blood cells (RBCs) to maintain HGB levels of at least  
34 9g/dl.  
35  
36  
37  
38  
39  
40  
41  
42

43 Blood will be collected from the central vein through a three-way catheter. The first  
44 10 ml of venous blood will be administered to the patient through the peripheral  
45 venous pathway, and then 3.5 ml of venous blood will be collected after syringe  
46 replacement. According to relevant guidelines, the samples of whole blood should be  
47 tested within 5 minutes after collection.  
48  
49  
50  
51

52 All blood samples will be tested by the same professional TEG operator. The operator  
53 of the TEG machine model [TEG 5000 (Haemoscope)] will not know the patient  
54 grouping information.  
55  
56  
57

58 R time is the incubation period from blood entry into the reactive vessels to initial clot  
59 formation. The lack of the R time extension prompt factor can be corrected by fresh  
60

frozen plasma (FFP)<sup>21</sup>. When the R time value is greater than 10 minutes, the patient will be infused with 2 U of FFP; when the R time value is greater than 15 minutes, the patient will be infused with 4 U of plasma; when the R time value is greater than 20 minutes, the patient will be infused with 6 U<sup>22</sup>.

Angle  $\alpha$  is the measurement of fibrin cross linkage mechanics or clot strengthening speed. A low angle may indicate a lack of fibrinogen, which is less affected by the PLT count, and this loss of function may be corrected by the use of FFP or fibrinogen. MA is a direct effect of fibrin and PLT binding properties of glycoprotein IIb/IIIa (GPIIb/IIIa), representing the strength of fibrin clots. Low MA may be corrected by the administration of PLTs<sup>21</sup>. At  $Ma < 45$ , PLT transfusion will begin. LY30 values show the rate of thrombus rupture at 30 minutes after MA. When  $LY30 > 8\%$ , this indicates hyperfibrinolysis, which can be corrected by tranexamic acid.

### Outcomes

Table 1 provides an overview of the outcomes and intervention or assessment time points.

Table 1. Study visits of the TEG-BT vs T-BT trial

| Time point         | Enrolment<br>Preoperative | Allocation<br>0 d | Post-allocation |        |        |        |        |        |        |        |        |        | Discharged |
|--------------------|---------------------------|-------------------|-----------------|--------|--------|--------|--------|--------|--------|--------|--------|--------|------------|
|                    |                           |                   | T<br>0          | T<br>1 | T<br>2 | T<br>3 | T<br>4 | T<br>5 | T<br>6 | T<br>7 | T<br>8 | T<br>9 |            |
| Enrolment          |                           |                   |                 |        |        |        |        |        |        |        |        |        |            |
| Eligibility screen | X                         |                   |                 |        |        |        |        |        |        |        |        |        |            |
| Informed consent   | X                         |                   |                 |        |        |        |        |        |        |        |        |        |            |
| Allocation         |                           | X                 |                 |        |        |        |        |        |        |        |        |        |            |
| Interventions      |                           |                   |                 |        |        |        |        |        |        |        |        |        |            |
| TEG-BT             |                           |                   | X               | X      | X      | X      |        |        |        |        |        |        |            |
| T-BT               |                           |                   |                 |        |        |        |        |        |        |        |        |        |            |
| Assessments        |                           |                   |                 |        |        |        |        |        |        |        |        |        |            |
| Demographic data   | X                         | X                 |                 |        |        |        |        |        |        |        |        |        |            |
| Baseline variables |                           | X                 |                 |        |        |        |        |        |        |        |        |        |            |
| HGB                |                           | X                 |                 |        |        |        | X      | X      | X      | X      | X      |        |            |
| Hct                |                           | X                 |                 |        |        |        | X      | X      | X      | X      | X      |        |            |
| PLTs               |                           | X                 |                 |        |        |        | X      | X      | X      | X      | X      |        |            |
| PT                 |                           | X                 |                 |        |        |        | X      | X      | X      | X      | X      |        |            |
| APTT               |                           | X                 |                 |        |        |        | X      | X      | X      | X      | X      |        |            |
| INR                |                           | X                 |                 |        |        |        | X      | X      | X      | X      | X      |        |            |

1  
2  
3  
4  
5  
6  
7  
8  
9  
10  
11  
12  
13  
14  
15  
16  
17  
18  
19  
20  
21  
22  
23  
24  
25  
26  
27  
28  
29  
30  
31  
32  
33  
34  
35  
36  
37  
38  
39  
40  
41  
42  
43  
44  
45  
46  
47  
48  
49  
50  
51  
52  
53  
54  
55  
56  
57  
58  
59  
60

|                                                               |   |  |   |   |   |   |   |
|---------------------------------------------------------------|---|--|---|---|---|---|---|
| Fibrinogen                                                    | X |  | X | X | X | X | X |
| Crystalloid fluid                                             |   |  | X |   |   |   |   |
| Artificial colloid fluid                                      |   |  | X |   |   |   |   |
| RBCs                                                          |   |  | X |   |   |   |   |
| FFP                                                           |   |  | X |   |   |   |   |
| PLTs                                                          |   |  | X |   |   |   |   |
| Fibrinogen                                                    |   |  | X |   |   |   |   |
| Prothrombin complex                                           |   |  | X |   |   |   |   |
| Albumin                                                       |   |  | X |   |   |   |   |
| Blood loss                                                    |   |  | X |   |   |   |   |
| Urine output                                                  |   |  | X |   |   |   |   |
| The amount of blood lost between 0 and 72 hours after surgery |   |  |   |   |   | X |   |
| Total blood transfusion between 0 and 72 hours after surgery  |   |  |   |   |   | X |   |
| The lowest HGB level                                          |   |  |   |   |   | X |   |
| ICU duration                                                  |   |  |   |   |   |   | X |
| Overall length of stay                                        |   |  |   |   |   |   | X |
| Total cost of the hospitalization                             |   |  |   |   |   |   | X |

T0, entering the operating room; T1, the performance of CRS; T2, before HIPEC; T3, after HIPEC; T4, at the end of surgery; T5, 2 hours after surgery; T6, postoperative day 1; T7, postoperative day 2; T8, postoperative day 3; T9, postoperative day 5.

TEG-BT, thromboelastography-guided blood product transfusion therapy; T-BT, traditional blood product transfusion therapy; HGB, haemoglobin; Hct, haematocrit; PLTs, platelets; PT, prothrombin time; APTT, activated partial thromboplastin time; INR, the international ratio; RBCs, red blood cells; FFP, fresh frozen plasma; ICU, intensive care unit.

### Primary outcome

The primary outcome will be the evaluation of perioperative blood transfusion. The amount of blood transfusion during the perioperative period refers to the total amount of blood transfusion given from the time patients enter the operating room (intra-operative) to 72 hours post-operatively (post-operative), including RBCs, FFP and PLTs.

### Secondary outcomes

The secondary results mainly include the following aspects:

- Transfusion volume during the operation: The total amount of RBCs, FFP and PLTs in the two groups.
- The total amount of intraoperative infusion: During the operation, the amount of fluid input from the two groups will include the total amount of crystalloid fluid, artificial colloid fluid, albumin, fibrinogen and prothrombin complex.
- The amount of blood lost during the operation: During the operation, the total output of the two groups will include blood loss and urine output.
- Effects of CRS/HIPEC on TEG: Before and after CRS/HIPEC, TEG monitoring will assess changes in blood coagulation function: including reaction time (R time), thrombosis time (K time), fibrinogen function ( $\alpha$  angle), thrombus strength (MA), and fibrinolysis (LY30).
- Effects of surgery on indicators of coagulation function: The influence of surgery on coagulation function. Based on the routine blood cell count and coagulation test, the values of HGB, PLT count, PT, APTT and INR will be recorded 1, 2, 3 and 5 days after the operation.
- The amount of total blood lost between 0 and 72 hours after surgery: total blood lost is calculated using the formula provided by Gross<sup>23</sup>, total blood loss =  $PBV \times (Hct_{pre} - Hct_{post}) / Hct_{ave}$ . The peripheral blood volume (PBV) is then calculated using the formula proposed by Nadler et al.<sup>24</sup>:  $PBV = k1 \times height(m)^3 + k2 \times weight(kg) + k3$ , where  $k1 = 0.3669$ ,  $k2 = 0.03219$ , and  $k3 = 0.6041$  for men, and  $k1 = 0.3561$ ,  $k2 = 0.03308$ , and  $k3 = 0.1833$  for women.
- Total blood transfusion in 0-72 hours after operation: If the patient needs a blood transfusion within 0-72 hours after the operation, we will record the total amount of RBCs, FFP and PLTs. If the patient does not receive a blood transfusion, the amount will be recorded as 0.
- The lowest HGB within 72 hours after surgery: Within three days after the operation, blood samples will be collected every morning to measure the HGB level. Patients who need a second operation due to postoperative bleeding within 72 hours will be excluded from this study.
- ICU duration.

- Overall length of stay.
- Total cost of the hospitalization.

### **Adverse events**

Adverse events in this study will mainly include intraoperative blood transfusion-related adverse reactions: nonhemolytic febrile reactions, allergic reactions, haemolytic reactions, circulatory overload and acid-base imbalance; etc. Once the anaesthesiologist identifies an adverse event, all patients should be accurately documented and immediately treated. If the condition progresses to severe intraoperative adverse events, such as shock, heart failure and massive blood loss, we will continue to follow up the patients to observe the final results.

### **Data collection**

Throughout the trial, the investigator – the anaesthesiologist involved in the operation – will be completely independent of the data collection staff. Data collection personnel are responsible for collecting preoperative and postoperative patient information and all data required in the trial protocol. Anonymous data will be collected in the case report form (CRF), either numerically or alphabetically. After the completion of the anonymous CRF table, the researcher shall confirm the authenticity and validity of all data, give a reasonable explanation for any missing data, or choose to exclude the test scheme.

### **Sample size calculation**

The Pass 11.0 software package was used for sample size evaluation. According to a small sample (86 cases) observation study in the early stage of the research group, it was found that the allogeneic blood volume used in the operation of PC patients undergoing thermal perfusion chemotherapy was  $1664.7 \pm 789.3$  ml [median: 1600 (1200, 2000)]. It is estimated that the blood volume of allogeneic patients used in thromboelastogram monitoring after intervention could be reduced by 20%, i.e.,  $1331.8 \pm 631.4$  ml, with a set  $\alpha$  value of 0.05 and a  $\beta$  value of 0.2, and the sample volume of the two groups was 73 cases. However, the index of allogeneic blood volume is non-normally distributed data, and a nonparametric test is planned to be used for analysis. Compared with the t-test, the efficiency of the Wilcoxon rank sum

1  
2  
3  
4 test is estimated to be approximately 95%, which means that the sample size required  
5 for the Wilcoxon test is 1.053 times the sample size required for the t-test<sup>25</sup>.  
6  
7 Therefore, the number of subjects to be included in the study was increased by 1.053  
8 times, and the drop-out rate was maintained to within 5%. The final target sample size  
9 was 81 people in each group (162 people in total).  
10  
11

## 12 **Statistical analysis**

### 13 **Baseline characteristics**

14  
15 Data analyses will be performed by the statistical software SPSS version 25.0. During  
16 the trial, the statistical analyst will be unaware of the participants' personal  
17 information and their group assignment. The Kolmogorov-Smirnov test will be used  
18 to test the normal distribution of continuous variables. If data values are normally  
19 distributed, they will be presented as the mean  $\pm$  standard deviation (SD) and will be  
20 compared using the independent t-test. If data values are not normally distributed,  
21 they will be presented as median and interquartile range (IQR) and compared using  
22 the nonparametric test. Categorical data will be shown as frequency and percentage  
23 and compared using the  $\chi^2$  test or Fisher's exact test.  
24  
25  
26  
27  
28  
29  
30  
31  
32  
33  
34

### 35 **Primary outcome and secondary outcomes**

36  
37 The primary outcome, the total amount of blood transfusion, will be presented as the  
38 mean  $\pm$  SD or median and IQR and compared using the independent t-test or  
39 Wilcoxon's rank sum test. For the secondary outcomes (i.e., transfusion volume  
40 during the operation, total amount of intraoperative infusion, amount of blood lost  
41 during the operation, total blood transfusion between 0 and 72 hours after surgery,  
42 and lowest HGB within 72 hours after surgery), the t-test will be used to compare the  
43 measurement data, and the rank sum test will be used for ranked data. The  $\chi^2$  test or  
44 Fisher's exact test will be used to analyse categorical data (adverse events). The effect  
45 size, mean differences, and their confidence intervals will be reported to make the  
46 results comparable. For repeated variables, a repeated-measures analysis of  
47 covariance will be performed with visit time as the repeated factor and group as the  
48 non-repeated factor.  
49  
50  
51  
52  
53  
54  
55  
56  
57  
58  
59

60 All analyses will be performed on the intention-to-treat population of participants who



1  
2  
3  
4 are given the randomized treatment. Missing data will be handled using the multiple  
5 imputation method. A complete-case analysis without imputation of missing data will  
6  
7 also be performed to determine whether the results are consistent. The significance  
8  
9 level that will be used for statistical analysis with two-tailed testing will be 5%. No  
10  
11 interim analyses will be performed.  
12

## 13 **DISCUSSION**

14  
15 The TEG-BT versus T-BT study is a single-centre and randomized clinical trial  
16  
17 with a blinded outcome assessment that aims to verify whether TEG-BT is superior to  
18  
19 T-BT in the perioperative blood transfusion treatment and prognosis of patients in  
20  
21 CRS/HIPEC. If it can be proven that compared with T-BT, TEG-BT can lead to less  
22  
23 intraoperative blood transfusion, more stable perioperative coagulation function, no  
24  
25 reduction in postoperative HGB levels and coagulation function, and no increase in  
26  
27 the incidence of adverse events, then the treatment and transfusion of various blood  
28  
29 products can be guided according to changes in the TEG index to achieve a better  
30  
31 prognosis.  
32

33 CRS/HIPEC is a therapeutic method for patients with colorectal, appendiceal,  
34  
35 ovarian, and gastric cancer with peritoneal metastasis and peritoneal  
36  
37 mesothelioma<sup>26-28</sup>. A relevant study demonstrated that intraoperative transfusion of  
38  
39 RBCs and a possibly increased peritoneal carcinomatosis index (PCI) are associated  
40  
41 with abnormal postoperative coagulation, including changes in the PLT count, INR,  
42  
43 and partial thromboplastin time (PTT)<sup>4</sup>. Based on the above points, optimal blood  
44  
45 product transfusion is of great importance for patients receiving CRS/HIPEC.  
46

47 SLTs, including the fibrinogen concentration, INR, PT and APTT, were initially  
48  
49 used to diagnose intraoperatively acquired coagulopathy and guide the administration  
50  
51 of treatment for massive haemorrhage<sup>29 30</sup>. However, relevant data suggest that the  
52  
53 PT, APTT and PLT count insufficiently demonstrate the impact of surgical stress,  
54  
55 hyperthermia, chemotherapy and considerable fluid shifts on the overall haemostatic  
56  
57 physiology of CRS/HIPEC<sup>18</sup>. Routine laboratory testing is performed in  
58  
59 PLT-deficient plasma whose results are not available to the clinician for 45–60  
60  
61 minutes<sup>30-32</sup>; in contrast, TEG can make up for the above deficiencies as a bedside

1  
2  
3  
4 analysis tool, estimating the clotting process in whole blood and providing real-time  
5 data<sup>33</sup>. Increasing evidence has demonstrated that the application of a TEG-guided  
6 transfusion strategy can reduce the demand for blood products and improve the  
7 morbidity of bleeding patients, mainly according to trials involving heart surgery with  
8 cardiopulmonary bypass and liver transplantation surgery<sup>34 35</sup>. After many clinical  
9 experiences and the application of TEG, targeted coagulation therapy has become  
10 feasible<sup>36</sup>. A previous prospective study indicated that conventional coagulation  
11 measures had no significance for CRS/HIPEC, but TEG monitoring confirmed the  
12 suitability of epidural analgesia after CRS/HIPEC by evaluating perioperative clot  
13 kinetics<sup>37</sup>. However, there is no relevant study to verify whether TEG can be applied  
14 to guide transfusion strategies for treating coagulation disorders due to CRS/HIPEC.  
15 Therefore, it is believed that the use of TEG in guiding perioperative blood  
16 transfusion treatment and improving prognosis of patients undergoing CRS/HIPEC is  
17 definitely worth exploring.

18  
19  
20  
21  
22  
23  
24  
25  
26  
27  
28  
29  
30  
31 The current study still has several limitations. First, for various reasons, we did not  
32 observe certain long-term outcomes, such as overall mortality, the incidence of  
33 reoperation, transfusion-related complications and thrombotic/thromboembolic  
34 events. Nevertheless, the influence of TEG-BT on these outcomes is worthy of further  
35 exploration. Moreover, due to the design of this trial, it is not available to determine  
36 the impact of pathophysiological changes in patients with potential diseases;  
37 therefore, we will remove severely ill patients from this study for safety reasons.  
38 Additionally, further studies may be required to determine whether TEG-BT  
39 combined with T-BT is superior to either alone for guiding the perioperative blood  
40 transfusion treatment of patients receiving CRS/HIPEC. Last but not least, this study  
41 is a single-centre trial, which may limit its generalisability; consequently, it is of great  
42 importance to perform multicentre clinical studies with a larger sample size to provide  
43 higher levels of evidence.

44  
45  
46  
47  
48  
49  
50  
51  
52  
53  
54  
55  
56 The primary outcome of our study is perioperative blood transfusion. As mentioned  
57 earlier, patients treated with CRS/HIPEC undergo an extensive abdominal incision,  
58 large fluid shifts, hyperthermic insults, and exposure to chemotherapeutic agents,  
59  
60

1  
2  
3  
4 which increases the likelihood of altered coagulation and excessive bleeding<sup>4 38 39</sup>.  
5  
6 Therefore, rational transfusion strategies are warranted. Extensive literature notes that  
7  
8 allogeneic blood transfusion itself is an independent risk factor for increased  
9  
10 morbidity (thrombotic/thromboembolic events, anaemia, nosocomial infections,  
11  
12 multiorgan dysfunction syndrome), mortality, hospital stay, hospital costs, etc., in  
13  
14 trauma, cardiovascular surgery, and ICU patients<sup>40-43</sup>. Nevertheless, TEG can be  
15  
16 performed to monitor dynamic changes in haemostasis, which is thought to enable  
17  
18 clinicians to distinguish between a surgical cause of bleeding or coagulopathy, to  
19  
20 guide and evaluate the choice of haemostatic treatment, and to reduce transfusion  
21  
22 requirements and improve survival<sup>34</sup>. In contrast, postoperative bleeding and  
23  
24 coagulation disorders also increase the transfusion of allogeneic blood products,  
25  
26 thereby affecting morbidity and mortality<sup>36</sup>. Hence, to further explore their interaction  
27  
28 in patients undergoing CRS/HIPEC, the indicators of coagulation function, lowest  
29  
30 value of HGB within 72 hours after surgery, ICU duration, overall length of stay, and  
31  
32 costs incurred during the hospital stay will be the secondary outcomes of this study.

33  
34 To conclude, the TEG-BT versus T-BT trial will be the first single-centre,  
35  
36 randomized clinical trial with a blinded outcome assessment undertaken to  
37  
38 substantiate the hypothesis that TEG-BT is superior to T-BT for administering  
39  
40 perioperative blood transfusion treatment and improving the prognosis of patients  
41  
42 undergoing CRS/HIPEC. If the benefits mentioned in the hypothesis are confirmed,  
43  
44 our study will improve a more goal-oriented transfusion strategy to reduce  
45  
46 intraoperative blood transfusion, stabilize perioperative coagulation function and  
47  
48 lighten the economic burden. Combined with our research results, the potential  
49  
50 significance of this trial is that it may influence future guidelines on anaesthesia  
51  
52 management of CRS/HIPEC and bring wider application for TEG.

## 52 **ETHICS AND DISSEMINATION**

### 53 **Ethical and legislative approvals**

54  
55 The TEG-BT vs T-BT study is registered at the Chinese Clinical Trial Registry with  
56  
57 the trial identification number ChiCTR2000028835. The research plan was approved  
58  
59 by the scientific research ethics committee of Beijing Shijitan Hospital Affiliated with  
60

1  
2  
3  
4 Capital Medical University (Approval Number: sjtkyll-lx-2020-3). We will inform  
5 investigators, all participants and the trial registry when there are significant changes  
6 to the study protocol. Before each participant enters the study, he/she and the  
7 researchers will sign an informed consent form. Patients have the right to refuse or  
8 withdraw from the study at any time, which will not affect any of their medical or  
9 other interests. The personal information of the participants will be kept confidential,  
10 and anonymous personal patient data will be shared according to requirements.

### 17 **Publication plan**

18  
19 With the consent of the main researchers and methodologists, the research coordinator  
20 will be responsible for preparing scientific statements and reports corresponding to  
21 the study. Based on the proportion of contribution to the study, the participating  
22 researchers and clinicians as well as biostatisticians and related researchers will be the  
23 co-authors of the ensuring report and publication. The rules of publication will be in  
24 accordance with international recommendations, and the publications will be  
25 submitted to peer-reviewed journals<sup>44</sup>.

### 35 **Author affiliations**

36  
37 <sup>1</sup>Department of Anaesthesiology, Beijing Shijitan Hospital, Capital Medical  
38 University, Beijing, China.

39  
40 <sup>2</sup>Department of Blood Transfusion, Beijing Shijitan Hospital, Capital Medical  
41 University, Beijing, China.

42  
43 <sup>3</sup>Department of Peritoneal Cancer Surgery, Beijing Shijitan Hospital, Capital Medical  
44 University, Beijing, China.

### 48 **Contributors**

49  
50 WS and ZQ contributed equally to this work and should be considered co-first  
51 authors. WS and ZQ contributed to the conception and drafting of the first manuscript  
52 for this trial. LP is the principal investigator of the entire study and edited the final  
53 manuscript. CL and LG contributed to the conception of the research protocol and  
54 will participate in the follow-up for this trial. All authors critically revised and  
55 modified the protocol and the article. They all approved the final version to be  
56  
57  
58  
59  
60

1  
2  
3  
4 published.

5  
6 **Funding**

7 This research was supported by The Youth Science Foundation of Beijing Shijitan  
8 Hospital Affiliated with Capital Medical University (No. 2019-q19).  
9

10  
11 **Competing interests**

12  
13 None declared.

14  
15 **Patient and public involvement**

16  
17 No patient involved.

18  
19 **Patient consent for publication**

20  
21 Obtained.

22  
23 **Provenance and peer review**

24  
25 Not commissioned; externally peer reviewed.

26  
27 **Data sharing statement**

28  
29 No additional unpublished data are available.  
30  
31

32  
33 **REFERENCES**

- 34  
35  
36 1. Glehen O, Osinsky D, Beaujard AC, et al. Natural history of peritoneal carcinomatosis from  
37  
38 nongynecologic malignancies. *Surgical Oncology Clinics of North America*  
39  
40 2003;12(3):729-39. doi: 10.1016/s1055-3207(03)00044-9  
41  
42  
43 2. Sargant N, Roy A, Simpson S, et al. A protocol for management of blood loss in surgical  
44  
45 treatment of peritoneal malignancy by cytoreductive surgery and hyperthermic  
46  
47 intraperitoneal chemotherapy. *Transfus Med* 2016;26(2):118-22. doi:  
48  
49 10.1111/tme.12301 [published Online First: 2016/04/01]  
50  
51  
52  
53 3. Gupta N, Kumar V, Garg R, et al. Anesthetic implications in hyperthermic intraperitoneal  
54  
55 chemotherapy. *J Anaesthesiol Clin Pharmacol* 2019;35(1):3-11. doi:  
56  
57 10.4103/joacp.JOACP\_93\_18 [published Online First: 2019/05/07]  
58  
59  
60

- 1  
2  
3  
4 4. Hurdle H, Bishop G, Walker A, et al. Coagulation after cytoreductive surgery and  
5  
6 hyperthermic intraperitoneal chemotherapy: a retrospective cohort analysis. *Canadian*  
7  
8 *Journal of Anesthesia/Journal canadien d'anesth é sie* 2017;64(11):1144-52. doi:  
9  
10 10.1007/s12630-017-0952-7  
11  
12
- 13  
14 5. Chua TC, Robertson G, Liauw W, et al. Intraoperative hyperthermic intraperitoneal  
15  
16 chemotherapy after cytoreductive surgery in ovarian cancer peritoneal carcinomatosis:  
17  
18 systematic review of current results. *J Cancer Res Clin Oncol* 2009;135(12):1637-45.  
19  
20 doi: 10.1007/s00432-009-0667-4 [published Online First: 2009/08/25]  
21  
22
- 23  
24 6. Korakianitis O, Daskalou T, Alevizos L, et al. Lack of significant intraoperative  
25  
26 coagulopathy in patients undergoing cytoreductive surgery and hyperthermic  
27  
28 intraperitoneal chemotherapy (HIPEC) indicates that epidural anaesthesia is a safe  
29  
30 option. *Int J Hyperthermia* 2015;31(8):857-62. doi: 10.3109/02656736.2015.1075606  
31  
32 [published Online First: 2015/10/09]  
33  
34
- 35  
36 7. Schmidt C, Creutzenberg M, Piso P, et al. Peri-operative anaesthetic management of  
37  
38 cytoreductive surgery with hyperthermic intraperitoneal chemotherapy. *Anaesthesia*  
39  
40 2008;63(4):389-95. doi: 10.1111/j.1365-2044.2007.05380.x  
41  
42  
43  
44
- 45  
46 8. Desgranges FP, Steghens A, Mithieux F, et al. Potential risks of thoracic epidural analgesia  
47  
48 in hyperthermic intraperitoneal chemotherapy. *J Surg Oncol* 2010;101(5):442. doi:  
49  
50 10.1002/jso.21485 [published Online First: 2010/03/10]  
51  
52
- 53  
54 9. Wijeyesundera DN, Beattie WS, Austin PC, et al. Epidural anaesthesia and survival after  
55  
56 intermediate-to-high risk non-cardiac surgery: a population-based cohort study. *The*  
57  
58 *Lancet* 2008;372(9638):562-69. doi: 10.1016/s0140-6736(08)61121-6  
59  
60

- 1  
2  
3  
4 10. Webb CA, Weyker PD, Moitra VK, et al. An overview of cytoreductive surgery and  
5  
6 hyperthermic intraperitoneal chemoperfusion for the anesthesiologist. *Anesth Analg*  
7  
8 2013;116(4):924-31. doi: 10.1213/ANE.0b013e3182860fff [published Online First:  
9  
10 2013/03/06]  
11  
12  
13  
14 11. Bell JC, Rylah BG, Chambers RW, et al. Perioperative management of patients  
15  
16 undergoing cytoreductive surgery combined with heated intraperitoneal  
17  
18 chemotherapy for peritoneal surface malignancy: a multi-institutional experience. *Ann*  
19  
20 *Surg Oncol* 2012;19(13):4244-51. doi: 10.1245/s10434-012-2496-y [published Online  
21  
22 First: 2012/07/19]  
23  
24  
25  
26  
27 12. Schmidt C, Creutzenberg M, Piso P, et al. Peri-operative anaesthetic management of  
28  
29 cytoreductive surgery with hyperthermic intraperitoneal chemotherapy. *Anaesthesia*  
30  
31 2008;63(4):389-95. doi: 10.1111/j.1365-2044.2007.05380.x [published Online First:  
32  
33 2008/03/14]  
34  
35  
36  
37  
38 13. Hartert H. Blood coagulation studies using thromboelastography, a new evaluation  
39  
40 technique (in German). *Klin Wochenschr* 1948;26(37-38):577-83. doi:  
41  
42 10.1007/bf01697545 [published Online First: 1948/10/01]  
43  
44  
45  
46 14. da Luz LT, Nascimento B, Rizoli S. Thrombelastography (TEG(R)): practical  
47  
48 considerations on its clinical use in trauma resuscitation. *Scand J Trauma Resusc*  
49  
50 *Emerg Med* 2013;21:29. doi: 10.1186/1757-7241-21-29 [published Online First:  
51  
52 2013/04/17]  
53  
54  
55  
56 15. Whiting D, DiNardo JA. TEG and ROTEM: technology and clinical applications. *Am J*  
57  
58 *Hematol* 2014;89(2):228-32. doi: 10.1002/ajh.23599 [published Online First:  
59  
60

- 1  
2  
3  
4 2013/10/15]
- 5  
6  
7 16. Meybohm P, Zacharowski K, Weber CF. Point-of-care coagulation management in  
8  
9 intensive care medicine. *Crit Care* 2013;17(2):218. doi: 10.1186/cc12527 [published  
10  
11 Online First: 2013/03/21]
- 12  
13  
14 17. Chitlur M, Sorensen B, Rivard GE, et al. Standardization of thromboelastography: a report  
15  
16 from the TEG-ROTEM working group. *Haemophilia* 2011;17(3):532-7. doi:  
17  
18 10.1111/j.1365-2516.2010.02451.x [published Online First: 2011/02/18]
- 19  
20  
21  
22 18. Van Poucke S, Huskens D, Van der Speeten K, et al. Thrombin generation and platelet  
23  
24 activation in cytoreductive surgery combined with hyperthermic intraperitoneal  
25  
26 chemotherapy - A prospective cohort study. *PLoS One* 2018;13(6):e0193657. doi:  
27  
28 10.1371/journal.pone.0193657 [published Online First: 2018/06/22]
- 29  
30  
31  
32 19. Teoh DA, Hutton MJH, Else S, et al. Epidural analgesia? A prospective analysis of  
33  
34 perioperative coagulation in cytoreductive surgery and hyperthermic intraperitoneal  
35  
36 chemotherapy. *Am J Surg* 2019;217(5):887-92. doi: 10.1016/j.amjsurg.2019.01.034  
37  
38 [published Online First: 2019/02/28]
- 39  
40  
41  
42 20. Moher D, Hopewell S, Schulz KF, et al. CONSORT 2010 Explanation and Elaboration:  
43  
44 updated guidelines for reporting parallel group randomised trials. *Bmj*  
45  
46 2010;340(mar23 1):c869-c69. doi: 10.1136/bmj.c869
- 47  
48  
49  
50 21. Olson JC. Thromboelastography-Guided Blood Product Use Before Invasive Procedures  
51  
52 in Cirrhosis With Severe Coagulopathy: A Randomized Controlled Trial. *Clin Liver Dis*  
53  
54 (*Hoboken*) 2019;13(4):102-05. doi: 10.1002/clid.749 [published Online First:  
55  
56 2019/05/08]
- 57  
58  
59  
60



- 1  
2  
3  
4 22. Welsh KJ, Nedelcu E, Bai Y, et al. How do we manage cardiopulmonary bypass  
5  
6 coagulopathy? *Transfusion* 2014;54(9):2158-66. doi: 10.1111/trf.12751  
7  
8  
9 23. Gross JB. Estimating allowable blood loss: corrected for dilution. *Anesthesiology*  
10  
11 1983;58(3):277-80. doi: 10.1097/00000542-198303000-00016 [published Online First:  
12  
13 1983/03/01]  
14  
15  
16  
17 24. Nadler SB, Hidalgo JH, Bloch T. Prediction of blood volume in normal human adults.  
18  
19 *Surgery* 1962;51(2):224-32. [published Online First: 1962/02/01]  
20  
21  
22 25. Page VJ, Ely EW, Gates S, et al. Effect of intravenous haloperidol on the duration of  
23  
24 delirium and coma in critically ill patients (Hope-ICU): a randomised, double-blind,  
25  
26 placebo-controlled trial. *The Lancet Respiratory Medicine* 2013;1(7):515-23. doi:  
27  
28 10.1016/s2213-2600(13)70166-8  
29  
30  
31  
32 26. Elias DM, Ouellet J-F. Intraperitoneal Chemohyperthermia. *Surgical Oncology Clinics of*  
33  
34 *North America* 2001;10(4):915-33. doi: 10.1016/s1055-3207(18)30039-5  
35  
36  
37  
38 27. Morano WF, Khalili M, Chi DS, et al. Clinical studies in CRS and HIPEC: Trials,  
39  
40 tribulations, and future directions-A systematic review. *J Surg Oncol*  
41  
42 2018;117(2):245-59. doi: 10.1002/jso.24813 [published Online First: 2017/11/10]  
43  
44  
45  
46 28. Sugarbaker PH. Peritonectomy procedures. *Ann Surg* 1995;221(1):29-42. doi:  
47  
48 10.1097/00000658-199501000-00004 [published Online First: 1995/01/01]  
49  
50  
51 29. Thomas D, Wee M, Clyburn P, et al. Blood transfusion and the anaesthetist: management  
52  
53 of massive haemorrhage. *Anaesthesia* 2010;65(11):1153-61. doi:  
54  
55 10.1111/j.1365-2044.2010.06538.x  
56  
57  
58  
59 30. Samama CM, Leroux G, Fléron M-H, et al. Point-of-care versus central laboratory  
60

- 1  
2  
3  
4 coagulation testing during haemorrhagic surgery. *Thrombosis and Haemostasis*  
5  
6 2017;101(02):394-401. doi: 10.1160/th08-06-0383  
7  
8  
9 31. Davenport R, Manson J, De'Ath H, et al. Functional definition and characterization of  
10  
11 acute traumatic coagulopathy. *Crit Care Med* 2011;39(12):2652-8. doi:  
12  
13 10.1097/CCM.0b013e3182281af5 [published Online First: 2011/07/19]  
14  
15  
16 32. Gorlinger K, Shore-Lesserson L, Dirkmann D, et al. Management of hemorrhage in  
17  
18 cardiothoracic surgery. *J Cardiothorac Vasc Anesth* 2013;27(4 Suppl):S20-34. doi:  
19  
20 10.1053/j.jvca.2013.05.014 [published Online First: 2013/08/09]  
21  
22  
23 33. Konstantinidi A, Sokou R, Parastatidou S, et al. Clinical Application of  
24  
25 Thromboelastography/Thromboelastometry (TEG/TEM) in the Neonatal Population: A  
26  
27 Narrative Review. *Semin Thromb Hemost* 2019;45(5):449-57. doi:  
28  
29 10.1055/s-0039-1692210 [published Online First: 2019/06/14]  
30  
31  
32 34. Wikkelsø A, Wetterslev J, Møller AM, et al. Thromboelastography (TEG) or  
33  
34 thromboelastometry (ROTEM) to monitor haemostatic treatment versus usual care in  
35  
36 adults or children with bleeding. *Cochrane Database of Systematic Reviews* 2016 doi:  
37  
38 10.1002/14651858.CD007871.pub3  
39  
40  
41 35. Mallett S, Abeyundara L, Clevenger B. Point-of-Care Testing in Liver Disease and Liver  
42  
43 Surgery. *Seminars in Thrombosis and Hemostasis* 2017;43(04):407-15. doi:  
44  
45 10.1055/s-0037-1599154  
46  
47  
48 36. Tanaka K, Bolliger D. Point-of-Care Coagulation Testing in Cardiac Surgery. *Seminars in*  
49  
50 *Thrombosis and Hemostasis* 2017;43(04):386-96. doi: 10.1055/s-0037-1599153  
51  
52  
53 37. Teoh DA, Hutton MJH, Else S, et al. Epidural analgesia? A prospective analysis of  
54  
55  
56  
57  
58  
59  
60

- 1  
2  
3  
4 perioperative coagulation in cytoreductive surgery and hyperthermic intraperitoneal  
5  
6 chemotherapy. *The American Journal of Surgery* 2019;217(5):887-92. doi:  
7  
8 10.1016/j.amjsurg.2019.01.034  
9  
10  
11 38. Esquivel J, Angulo F, Bland RK, et al. Hemodynamic and cardiac function parameters  
12  
13 during heated intraoperative intraperitoneal chemotherapy using the open "coliseum  
14  
15 technique". *Ann Surg Oncol* 2000;7(4):296-300. doi: 10.1007/s10434-000-0296-2  
16  
17 [published Online First: 2000/05/20]  
18  
19  
20  
21 39. Kanakoudis F, Petrou A, Michaloudis D, et al. Anaesthesia for intra-peritoneal perfusion of  
22  
23 hyperthermic chemotherapy. Haemodynamic changes, oxygen consumption and  
24  
25 delivery. *Anaesthesia* 1996;51(11):1033-6. doi: 10.1111/j.1365-2044.1996.tb14998.x  
26  
27 [published Online First: 1996/11/01]  
28  
29  
30  
31 40. Murphy GJ, Reeves BC, Rogers CA, et al. Increased Mortality, Postoperative Morbidity,  
32  
33 and Cost After Red Blood Cell Transfusion in Patients Having Cardiac Surgery.  
34  
35 *Circulation* 2007;116(22):2544-52. doi: 10.1161/circulationaha.107.698977  
36  
37  
38  
39 41. Marik PE, Corwin HL. Efficacy of red blood cell transfusion in the critically ill: A systematic  
40  
41 review of the literature\*. *Critical Care Medicine* 2008;36(9):2667-74. doi:  
42  
43 10.1097/CCM.0b013e3181844677  
44  
45  
46  
47 42. Reeves BC, Murphy GJ. Increased mortality, morbidity, and cost associated with red  
48  
49 blood cell transfusion after cardiac surgery. *Current Opinion in Anaesthesiology*  
50  
51 2008;21(5):669-73. doi: 10.1097/ACO.0b013e32830dd087  
52  
53  
54  
55 43. Bjursten H, Dardashti A, Ederoth P, et al. Increased long-term mortality with plasma  
56  
57 transfusion after coronary artery bypass surgery. *Intensive Care Medicine*  
58  
59  
60

1  
2  
3  
4 2012;39(3):437-44. doi: 10.1007/s00134-012-2723-9  
5

6  
7 44. International Committee of Medical Journal Editors (ICMJE): Uniform Requirements for  
8  
9 Manuscripts Submitted to Biomedical Journals: writing and editing for biomedical  
10  
11 publication. *Haematologica* 2004;89(3):264. [published Online First: 2004/03/17]  
12  
13  
14  
15

16  
17 Figure 1

18 Study flow diagram of the TEG-BT vs T-BT trial.

19  
20 TEG-BT, thromboelastography-guided blood product transfusion therapy; T-BT,  
21 traditional blood product transfusion therapy; CRS/HIPEC, cytoreductive surgery  
22 combined with hyperthermic intraperitoneal chemotherapy.  
23  
24  
25  
26  
27  
28  
29  
30  
31  
32  
33  
34  
35  
36  
37  
38  
39  
40  
41  
42  
43  
44  
45  
46  
47  
48  
49  
50  
51  
52  
53  
54  
55  
56  
57  
58  
59  
60

1  
2  
3  
4  
5  
6  
7  
8  
9  
10  
11  
12  
13  
14  
15  
16  
17  
18  
19  
20  
21  
22  
23  
24  
25  
26  
27  
28  
29  
30  
31  
32  
33  
34  
35  
36  
37  
38  
39  
40  
41  
42  
43  
44  
45  
46  
47  
48  
49  
50  
51  
52  
53  
54  
55  
56  
57  
58  
59  
60

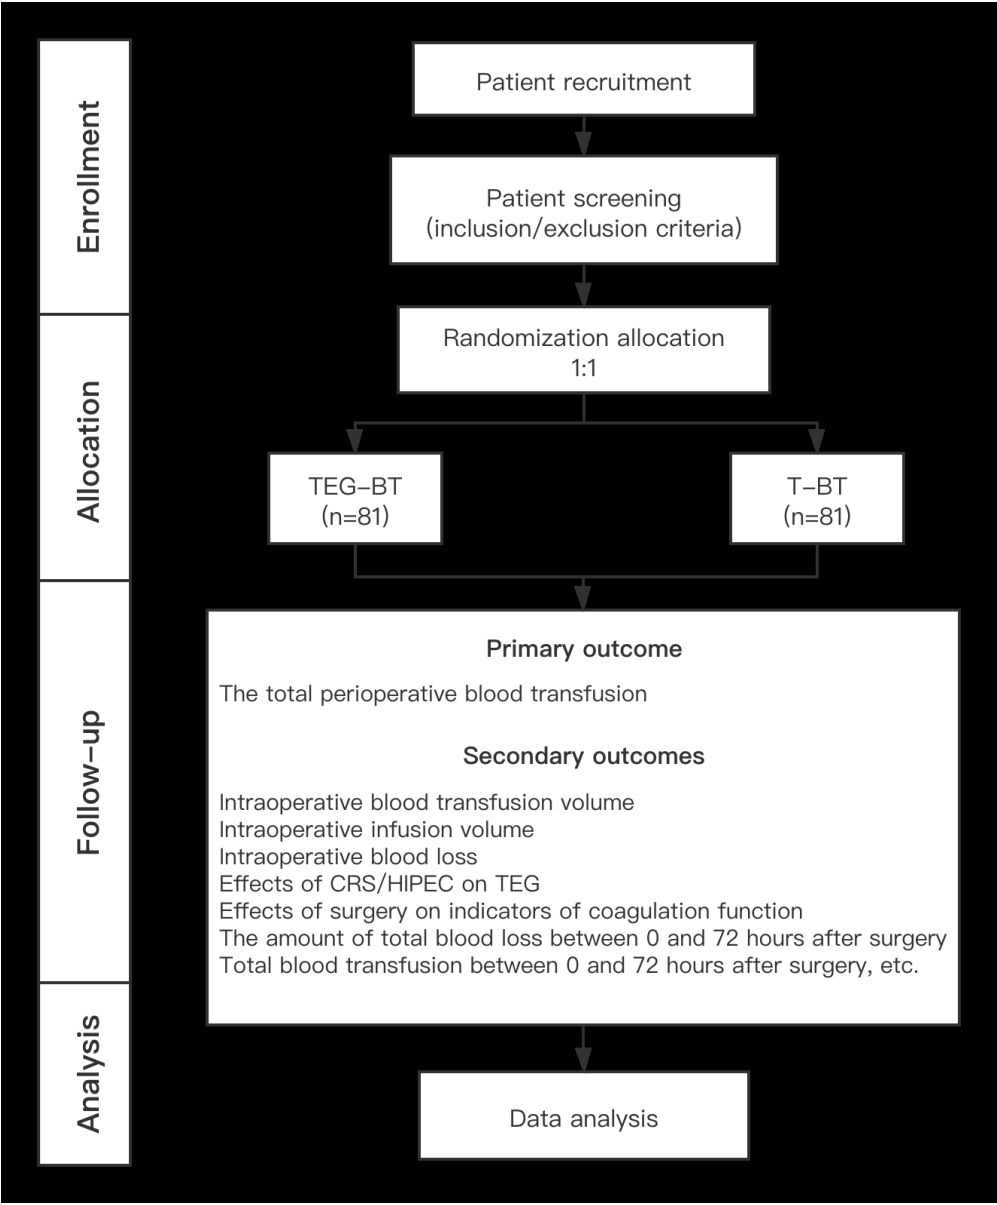

Figure 1. Study flow diagram of the TEG-BT vs T-BT trial.

467x561mm (72 x 72 DPI)

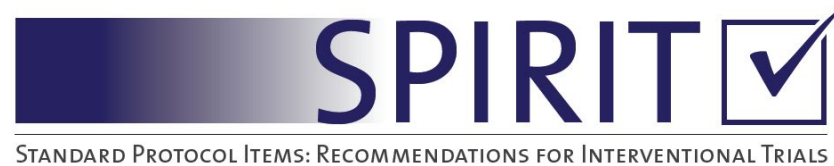

SPIRIT 2013 Checklist: Recommended items to address in a clinical trial protocol and related documents\*

| Section/item                      | Item No | Description                                                                                                                                                                                                                                                                              | Addressed on page number |
|-----------------------------------|---------|------------------------------------------------------------------------------------------------------------------------------------------------------------------------------------------------------------------------------------------------------------------------------------------|--------------------------|
| <b>Administrative information</b> |         |                                                                                                                                                                                                                                                                                          |                          |
| Title                             | 1       | Descriptive title identifying the study design, population, interventions, and, if applicable, trial acronym                                                                                                                                                                             | ___ 1 ___                |
| Trial registration                | 2a      | Trial identifier and registry name. If not yet registered, name of intended registry                                                                                                                                                                                                     | ___ 3, 16 ___            |
|                                   | 2b      | All items from the World Health Organization Trial Registration Data Set                                                                                                                                                                                                                 | ___ 3, 16 ___            |
| Protocol version                  | 3       | Date and version identifier                                                                                                                                                                                                                                                              | ___ 3, 16 ___            |
| Funding                           | 4       | Sources and types of financial, material, and other support                                                                                                                                                                                                                              | ___ 17 ___               |
| Roles and responsibilities        | 5a      | Names, affiliations, and roles of protocol contributors                                                                                                                                                                                                                                  | ___ 1, 17 ___            |
|                                   | 5b      | Name and contact information for the trial sponsor                                                                                                                                                                                                                                       | ___ 1, 17 ___            |
|                                   | 5c      | Role of study sponsor and funders, if any, in study design; collection, management, analysis, and interpretation of data; writing of the report; and the decision to submit the report for publication, including whether they will have ultimate authority over any of these activities | ___ 1, 17 ___            |
|                                   | 5d      | Composition, roles, and responsibilities of the coordinating centre, steering committee, endpoint adjudication committee, data management team, and other individuals or groups overseeing the trial, if applicable (see Item 21a for data monitoring committee)                         | ___ N/A ___              |

|    |                                                           |     |                                                                                                               |                     |
|----|-----------------------------------------------------------|-----|---------------------------------------------------------------------------------------------------------------|---------------------|
| 1  | <b>Introduction</b>                                       |     |                                                                                                               |                     |
| 2  |                                                           |     |                                                                                                               |                     |
| 3  | Background and                                            | 6a  | Description of research question and justification for undertaking the trial, including summary of relevant   | _____4-6_____       |
| 4  | rationale                                                 |     | studies (published and unpublished) examining benefits and harms for each intervention                        |                     |
| 5  |                                                           |     |                                                                                                               |                     |
| 6  |                                                           | 6b  | Explanation for choice of comparators                                                                         | _____5-6_____       |
| 7  |                                                           |     |                                                                                                               |                     |
| 8  | Objectives                                                | 7   | Specific objectives or hypotheses                                                                             | _____6_____         |
| 9  |                                                           |     |                                                                                                               |                     |
| 10 | Trial design                                              | 8   | Description of trial design including type of trial (eg, parallel group, crossover, factorial, single group), |                     |
| 11 |                                                           |     | allocation ratio, and framework (eg, superiority, equivalence, noninferiority, exploratory)                   | _____6_____         |
| 12 |                                                           |     |                                                                                                               |                     |
| 13 |                                                           |     |                                                                                                               |                     |
| 14 | <b>Methods: Participants, interventions, and outcomes</b> |     |                                                                                                               |                     |
| 15 |                                                           |     |                                                                                                               |                     |
| 16 | Study setting                                             | 9   | Description of study settings (eg, community clinic, academic hospital) and list of countries where data will | _____6_____         |
| 17 |                                                           |     | be collected. Reference to where list of study sites can be obtained                                          |                     |
| 18 |                                                           |     |                                                                                                               |                     |
| 19 | Eligibility criteria                                      | 10  | Inclusion and exclusion criteria for participants. If applicable, eligibility criteria for study centres and  | _____6, 7_____      |
| 20 |                                                           |     | individuals who will perform the interventions (eg, surgeons, psychotherapists)                               |                     |
| 21 |                                                           |     |                                                                                                               |                     |
| 22 | Interventions                                             | 11a | Interventions for each group with sufficient detail to allow replication, including how and when they will be | _____8, 9_____      |
| 23 |                                                           |     | administered                                                                                                  |                     |
| 24 |                                                           |     |                                                                                                               |                     |
| 25 |                                                           | 11b | Criteria for discontinuing or modifying allocated interventions for a given trial participant (eg, drug dose  | ___8,9,11,12___     |
| 26 |                                                           |     | change in response to harms, participant request, or improving/worsening disease)                             |                     |
| 27 |                                                           |     |                                                                                                               |                     |
| 28 |                                                           | 11c | Strategies to improve adherence to intervention protocols, and any procedures for monitoring adherence        | _____8_____         |
| 29 |                                                           |     | (eg, drug tablet return, laboratory tests)                                                                    |                     |
| 30 |                                                           |     |                                                                                                               |                     |
| 31 |                                                           | 11d | Relevant concomitant care and interventions that are permitted or prohibited during the trial                 | _____8,_____        |
| 32 |                                                           |     |                                                                                                               |                     |
| 33 | Outcomes                                                  | 12  | Primary, secondary, and other outcomes, including the specific measurement variable (eg, systolic blood       | _____9, 10, 11___   |
| 34 |                                                           |     | pressure), analysis metric (eg, change from baseline, final value, time to event), method of aggregation (eg, |                     |
| 35 |                                                           |     | median, proportion), and time point for each outcome. Explanation of the clinical relevance of chosen         |                     |
| 36 |                                                           |     | efficacy and harm outcomes is strongly recommended                                                            |                     |
| 37 |                                                           |     |                                                                                                               |                     |
| 38 | Participant timeline                                      | 13  | Time schedule of enrolment, interventions (including any run-ins and washouts), assessments, and visits for   | _____9, 10, 11_____ |
| 39 |                                                           |     | participants. A schematic diagram is highly recommended (see Figure)                                          |                     |
| 40 |                                                           |     |                                                                                                               |                     |
| 41 |                                                           |     |                                                                                                               |                     |
| 42 |                                                           |     |                                                                                                               |                     |
| 43 |                                                           |     |                                                                                                               |                     |
| 44 |                                                           |     |                                                                                                               |                     |
| 45 |                                                           |     |                                                                                                               |                     |
| 46 |                                                           |     |                                                                                                               |                     |

|   |             |    |                                                                                                                                                                                       |               |
|---|-------------|----|---------------------------------------------------------------------------------------------------------------------------------------------------------------------------------------|---------------|
| 1 | Sample size | 14 | Estimated number of participants needed to achieve study objectives and how it was determined, including clinical and statistical assumptions supporting any sample size calculations | _____12_____  |
| 2 |             |    |                                                                                                                                                                                       |               |
| 3 |             |    |                                                                                                                                                                                       |               |
| 4 | Recruitment | 15 | Strategies for achieving adequate participant enrolment to reach target sample size                                                                                                   | _____N/A_____ |
| 5 |             |    |                                                                                                                                                                                       |               |

### 6 **Methods: Assignment of interventions (for controlled trials)**

#### 7 Allocation:

|    |                    |     |                                                                                                                                                                                                                                                                                                                                                          |             |
|----|--------------------|-----|----------------------------------------------------------------------------------------------------------------------------------------------------------------------------------------------------------------------------------------------------------------------------------------------------------------------------------------------------------|-------------|
| 8  |                    |     |                                                                                                                                                                                                                                                                                                                                                          |             |
| 9  |                    |     |                                                                                                                                                                                                                                                                                                                                                          |             |
| 10 | Sequence           | 16a | Method of generating the allocation sequence (eg, computer-generated random numbers), and list of any factors for stratification. To reduce predictability of a random sequence, details of any planned restriction (eg, blocking) should be provided in a separate document that is unavailable to those who enrol participants or assign interventions | _____7_____ |
| 11 | generation         |     |                                                                                                                                                                                                                                                                                                                                                          |             |
| 12 |                    |     |                                                                                                                                                                                                                                                                                                                                                          |             |
| 13 |                    |     |                                                                                                                                                                                                                                                                                                                                                          |             |
| 14 |                    |     |                                                                                                                                                                                                                                                                                                                                                          |             |
| 15 |                    |     |                                                                                                                                                                                                                                                                                                                                                          |             |
| 16 | Allocation         | 16b | Mechanism of implementing the allocation sequence (eg, central telephone; sequentially numbered, opaque, sealed envelopes), describing any steps to conceal the sequence until interventions are assigned                                                                                                                                                | _____7_____ |
| 17 | concealment        |     |                                                                                                                                                                                                                                                                                                                                                          |             |
| 18 | mechanism          |     |                                                                                                                                                                                                                                                                                                                                                          |             |
| 19 |                    |     |                                                                                                                                                                                                                                                                                                                                                          |             |
| 20 | Implementation     | 16c | Who will generate the allocation sequence, who will enrol participants, and who will assign participants to interventions                                                                                                                                                                                                                                | _____7_____ |
| 21 |                    |     |                                                                                                                                                                                                                                                                                                                                                          |             |
| 22 |                    |     |                                                                                                                                                                                                                                                                                                                                                          |             |
| 23 |                    |     |                                                                                                                                                                                                                                                                                                                                                          |             |
| 24 | Blinding (masking) | 17a | Who will be blinded after assignment to interventions (eg, trial participants, care providers, outcome assessors, data analysts), and how                                                                                                                                                                                                                | _____7_____ |
| 25 |                    |     |                                                                                                                                                                                                                                                                                                                                                          |             |
| 26 |                    |     |                                                                                                                                                                                                                                                                                                                                                          |             |
| 27 |                    | 17b | If blinded, circumstances under which unblinding is permissible, and procedure for revealing a participant's allocated intervention during the trial                                                                                                                                                                                                     | _____7_____ |
| 28 |                    |     |                                                                                                                                                                                                                                                                                                                                                          |             |
| 29 |                    |     |                                                                                                                                                                                                                                                                                                                                                          |             |
| 30 |                    |     |                                                                                                                                                                                                                                                                                                                                                          |             |

### 31 **Methods: Data collection, management, and analysis**

|    |                 |     |                                                                                                                                                                                                                                                                                                                                                                                                              |                |
|----|-----------------|-----|--------------------------------------------------------------------------------------------------------------------------------------------------------------------------------------------------------------------------------------------------------------------------------------------------------------------------------------------------------------------------------------------------------------|----------------|
| 32 |                 |     |                                                                                                                                                                                                                                                                                                                                                                                                              |                |
| 33 | Data collection | 18a | Plans for assessment and collection of outcome, baseline, and other trial data, including any related processes to promote data quality (eg, duplicate measurements, training of assessors) and a description of study instruments (eg, questionnaires, laboratory tests) along with their reliability and validity, if known. Reference to where data collection forms can be found, if not in the protocol | _____8-12_____ |
| 34 | methods         |     |                                                                                                                                                                                                                                                                                                                                                                                                              |                |
| 35 |                 |     |                                                                                                                                                                                                                                                                                                                                                                                                              |                |
| 36 |                 |     |                                                                                                                                                                                                                                                                                                                                                                                                              |                |
| 37 |                 |     |                                                                                                                                                                                                                                                                                                                                                                                                              |                |
| 38 |                 |     |                                                                                                                                                                                                                                                                                                                                                                                                              |                |
| 39 |                 | 18b | Plans to promote participant retention and complete follow-up, including list of any outcome data to be collected for participants who discontinue or deviate from intervention protocols                                                                                                                                                                                                                    | _____8-12_____ |
| 40 |                 |     |                                                                                                                                                                                                                                                                                                                                                                                                              |                |
| 41 |                 |     |                                                                                                                                                                                                                                                                                                                                                                                                              |                |
| 42 |                 |     |                                                                                                                                                                                                                                                                                                                                                                                                              |                |



|    |                                 |     |                                                                                                                                                                                                                                                                                                                                       |               |
|----|---------------------------------|-----|---------------------------------------------------------------------------------------------------------------------------------------------------------------------------------------------------------------------------------------------------------------------------------------------------------------------------------------|---------------|
| 1  | Data management                 | 19  | Plans for data entry, coding, security, and storage, including any related processes to promote data quality (eg, double data entry; range checks for data values). Reference to where details of data management procedures can be found, if not in the protocol                                                                     | ___ 8-12 ___  |
| 2  |                                 |     |                                                                                                                                                                                                                                                                                                                                       |               |
| 3  |                                 |     |                                                                                                                                                                                                                                                                                                                                       |               |
| 4  |                                 |     |                                                                                                                                                                                                                                                                                                                                       |               |
| 5  | Statistical methods             | 20a | Statistical methods for analysing primary and secondary outcomes. Reference to where other details of the statistical analysis plan can be found, if not in the protocol                                                                                                                                                              | ___ 12-13 ___ |
| 6  |                                 |     |                                                                                                                                                                                                                                                                                                                                       |               |
| 7  |                                 |     |                                                                                                                                                                                                                                                                                                                                       |               |
| 8  |                                 | 20b | Methods for any additional analyses (eg, subgroup and adjusted analyses)                                                                                                                                                                                                                                                              | ___ 12,13 ___ |
| 9  |                                 |     |                                                                                                                                                                                                                                                                                                                                       |               |
| 10 |                                 | 20c | Definition of analysis population relating to protocol non-adherence (eg, as randomised analysis), and any statistical methods to handle missing data (eg, multiple imputation)                                                                                                                                                       | ___ 12-13 ___ |
| 11 |                                 |     |                                                                                                                                                                                                                                                                                                                                       |               |
| 12 |                                 |     |                                                                                                                                                                                                                                                                                                                                       |               |
| 13 |                                 |     |                                                                                                                                                                                                                                                                                                                                       |               |
| 14 | <b>Methods: Monitoring</b>      |     |                                                                                                                                                                                                                                                                                                                                       |               |
| 15 |                                 |     |                                                                                                                                                                                                                                                                                                                                       |               |
| 16 | Data monitoring                 | 21a | Composition of data monitoring committee (DMC); summary of its role and reporting structure; statement of whether it is independent from the sponsor and competing interests; and reference to where further details about its charter can be found, if not in the protocol. Alternatively, an explanation of why a DMC is not needed | ___ 8-12 ___  |
| 17 |                                 |     |                                                                                                                                                                                                                                                                                                                                       |               |
| 18 |                                 |     |                                                                                                                                                                                                                                                                                                                                       |               |
| 19 |                                 |     |                                                                                                                                                                                                                                                                                                                                       |               |
| 20 |                                 |     |                                                                                                                                                                                                                                                                                                                                       |               |
| 21 |                                 |     |                                                                                                                                                                                                                                                                                                                                       |               |
| 22 |                                 | 21b | Description of any interim analyses and stopping guidelines, including who will have access to these interim results and make the final decision to terminate the trial                                                                                                                                                               | ___ 8-12 ___  |
| 23 |                                 |     |                                                                                                                                                                                                                                                                                                                                       |               |
| 24 |                                 |     |                                                                                                                                                                                                                                                                                                                                       |               |
| 25 | Harms                           | 22  | Plans for collecting, assessing, reporting, and managing solicited and spontaneously reported adverse events and other unintended effects of trial interventions or trial conduct                                                                                                                                                     | ___ 11-12 ___ |
| 26 |                                 |     |                                                                                                                                                                                                                                                                                                                                       |               |
| 27 |                                 |     |                                                                                                                                                                                                                                                                                                                                       |               |
| 28 | Auditing                        | 23  | Frequency and procedures for auditing trial conduct, if any, and whether the process will be independent from investigators and the sponsor                                                                                                                                                                                           | ___ 12 ___    |
| 29 |                                 |     |                                                                                                                                                                                                                                                                                                                                       |               |
| 30 |                                 |     |                                                                                                                                                                                                                                                                                                                                       |               |
| 31 |                                 |     |                                                                                                                                                                                                                                                                                                                                       |               |
| 32 | <b>Ethics and dissemination</b> |     |                                                                                                                                                                                                                                                                                                                                       |               |
| 33 |                                 |     |                                                                                                                                                                                                                                                                                                                                       |               |
| 34 | Research ethics approval        | 24  | Plans for seeking research ethics committee/institutional review board (REC/IRB) approval                                                                                                                                                                                                                                             | ___ 16 ___    |
| 35 |                                 |     |                                                                                                                                                                                                                                                                                                                                       |               |
| 36 |                                 |     |                                                                                                                                                                                                                                                                                                                                       |               |
| 37 | Protocol amendments             | 25  | Plans for communicating important protocol modifications (eg, changes to eligibility criteria, outcomes, analyses) to relevant parties (eg, investigators, REC/IRBs, trial participants, trial registries, journals, regulators)                                                                                                      | ___ 16 ___    |
| 38 |                                 |     |                                                                                                                                                                                                                                                                                                                                       |               |
| 39 |                                 |     |                                                                                                                                                                                                                                                                                                                                       |               |
| 40 |                                 |     |                                                                                                                                                                                                                                                                                                                                       |               |
| 41 |                                 |     |                                                                                                                                                                                                                                                                                                                                       |               |
| 42 |                                 |     |                                                                                                                                                                                                                                                                                                                                       |               |
| 43 |                                 |     |                                                                                                                                                                                                                                                                                                                                       |               |
| 44 |                                 |     |                                                                                                                                                                                                                                                                                                                                       |               |
| 45 |                                 |     |                                                                                                                                                                                                                                                                                                                                       |               |
| 46 |                                 |     |                                                                                                                                                                                                                                                                                                                                       |               |

|    |                               |     |                                                                                                                                                                                                                                                                                     |                  |
|----|-------------------------------|-----|-------------------------------------------------------------------------------------------------------------------------------------------------------------------------------------------------------------------------------------------------------------------------------------|------------------|
| 1  | Consent or assent             | 26a | Who will obtain informed consent or assent from potential trial participants or authorised surrogates, and how (see Item 32)                                                                                                                                                        | _____16_____     |
| 2  |                               |     |                                                                                                                                                                                                                                                                                     |                  |
| 3  |                               |     |                                                                                                                                                                                                                                                                                     |                  |
| 4  |                               | 26b | Additional consent provisions for collection and use of participant data and biological specimens in ancillary studies, if applicable                                                                                                                                               | _____16_____     |
| 5  |                               |     |                                                                                                                                                                                                                                                                                     |                  |
| 6  |                               |     |                                                                                                                                                                                                                                                                                     |                  |
| 7  | Confidentiality               | 27  | How personal information about potential and enrolled participants will be collected, shared, and maintained in order to protect confidentiality before, during, and after the trial                                                                                                | _____16_____     |
| 8  |                               |     |                                                                                                                                                                                                                                                                                     |                  |
| 9  |                               |     |                                                                                                                                                                                                                                                                                     |                  |
| 10 | Declaration of interests      | 28  | Financial and other competing interests for principal investigators for the overall trial and each study site                                                                                                                                                                       | _____17_____     |
| 11 |                               |     |                                                                                                                                                                                                                                                                                     |                  |
| 12 |                               |     |                                                                                                                                                                                                                                                                                     |                  |
| 13 | Access to data                | 29  | Statement of who will have access to the final trial dataset, and disclosure of contractual agreements that limit such access for investigators                                                                                                                                     | _____16, 17_____ |
| 14 |                               |     |                                                                                                                                                                                                                                                                                     |                  |
| 15 |                               |     |                                                                                                                                                                                                                                                                                     |                  |
| 16 | Ancillary and post-trial care | 30  | Provisions, if any, for ancillary and post-trial care, and for compensation to those who suffer harm from trial participation                                                                                                                                                       | _____N/A_____    |
| 17 |                               |     |                                                                                                                                                                                                                                                                                     |                  |
| 18 |                               |     |                                                                                                                                                                                                                                                                                     |                  |
| 19 |                               |     |                                                                                                                                                                                                                                                                                     |                  |
| 20 | Dissemination policy          | 31a | Plans for investigators and sponsor to communicate trial results to participants, healthcare professionals, the public, and other relevant groups (eg, via publication, reporting in results databases, or other data sharing arrangements), including any publication restrictions | _____16, 17_____ |
| 21 |                               |     |                                                                                                                                                                                                                                                                                     |                  |
| 22 |                               |     |                                                                                                                                                                                                                                                                                     |                  |
| 23 |                               |     |                                                                                                                                                                                                                                                                                     |                  |
| 24 |                               | 31b | Authorship eligibility guidelines and any intended use of professional writers                                                                                                                                                                                                      | _____17_____     |
| 25 |                               |     |                                                                                                                                                                                                                                                                                     |                  |
| 26 |                               | 31c | Plans, if any, for granting public access to the full protocol, participant-level dataset, and statistical code                                                                                                                                                                     | _____18_____     |
| 27 |                               |     |                                                                                                                                                                                                                                                                                     |                  |
| 28 |                               |     |                                                                                                                                                                                                                                                                                     |                  |
| 29 | <b>Appendices</b>             |     |                                                                                                                                                                                                                                                                                     |                  |
| 30 |                               |     |                                                                                                                                                                                                                                                                                     |                  |
| 31 | Informed consent materials    | 32  | Model consent form and other related documentation given to participants and authorised surrogates                                                                                                                                                                                  | _____N/A_____    |
| 32 |                               |     |                                                                                                                                                                                                                                                                                     |                  |
| 33 |                               |     |                                                                                                                                                                                                                                                                                     |                  |
| 34 | Biological specimens          | 33  | Plans for collection, laboratory evaluation, and storage of biological specimens for genetic or molecular analysis in the current trial and for future use in ancillary studies, if applicable                                                                                      | _____N/A_____    |
| 35 |                               |     |                                                                                                                                                                                                                                                                                     |                  |
| 36 |                               |     |                                                                                                                                                                                                                                                                                     |                  |

\*It is strongly recommended that this checklist be read in conjunction with the SPIRIT 2013 Explanation & Elaboration for important clarification on the items. Amendments to the protocol should be tracked and dated. The SPIRIT checklist is copyrighted by the SPIRIT Group under the Creative Commons "[Attribution-NonCommercial-NoDerivs 3.0 Unported](https://creativecommons.org/licenses/by-nc-nd/3.0/)" license.
